# Supplementary material for: Mono- and sym-pentahalogenated corannulenes: reaction optimization & purification by in process product analysis
Source: Royal Society of Chemistry journal article supplement (doi:10.1039/d2re00010e), 2022-01-01

# Supporting Information

## Halogenated Corannulenes: Reaction Optimization & Purification

### by In Process Product Analysis

#### Table of contents:

1. Materials and methods
2. General procedure for catalyst selection tests
3. General procedure for condition selection tests
4. Preparation of monoiodocorannulene **2-I** in gram scale
5. Preparation of monobromocorannulene **2-Br** in gram scale
6. Preparation of *sym*-pentachlorocorannulene **3**
7. Preparation of overchlorinated corannulene **6**
8. Preparation of 1,4,6,9-tetrakis(4-methoxyphenylthio)corannulene **7**
9. HPLC traces & data plotting of standard curves
10. HPLC traces of catalyst selection tests
11. HPLC traces of condition selection tests
12. HPLC traces of purified **2-I**, **2-Br** & **2-Br<sub>2</sub>**
13. Copies of NMR spectra for crude and purified **2-I**
14. Characterization of compounds **6-7**
15. Copies of NMR spectra for **6-7**

#### 1. General materials and methods:

Unless otherwise stated, all solvents were purchased from Heowns Biochem LLC or Concord Technology and used without further purification. Substrates and reagents were purchased from TCI or Heowns Biochem LLC and used as received.

Unless otherwise stated, all HPLC tests are performed on Shimazu LC-20AT. Column used is Agilent Zorbax CN1, 150 x 4.60 mm, 5  $\mu$ m. Analytical method: mobile phase: *n*-hexane; flow rate: 0.5 mL/min; Sample injection volume: 2  $\mu$ L detection: 254 nm.

<sup>1</sup>H-NMR spectra were recorded on a Bruker Avance-400 or Bruker Avance-600 instrument and are reported relative to residual solvent: CHCl<sub>3</sub> ( $\delta$  7.26 ppm) or CH<sub>2</sub>Cl<sub>2</sub> ( $\delta$  5.30 ppm). <sup>13</sup>C-NMR spectra were recorded on the same instrument and are reported relative to CHCl<sub>3</sub> ( $\delta$  77.16 ppm) or CH<sub>2</sub>Cl<sub>2</sub> ( $\delta$  53.84 ppm). Data for <sup>1</sup>H-NMR are

reported as follows: chemical shift ( $\delta$ / ppm) (integration, multiplicity, coupling constant (Hz)). Multiplicities are reported as follows: s = singlet, d = doublet, t = triplet, q = quartet, p = pentet, m = multiplet, br. s = broad singlet, app = apparent. Data for  $^{13}\text{C}$ -NMR are reported in terms of chemical shift ( $\delta$ / ppm) and multiplicity (C, CH,  $\text{CH}_2$  or  $\text{CH}_3$ ). High resolution mass was obtained by SPST or China University of Petroleum. For accurate mass measurements the deviation from the calculated formula is reported in ppm.

## 2. Procedures for standard curve plotting

### Corannulene 1:

4.13 mg, 2.50 mg, 1.50 mg, 0.90 mg **1** (purity: 98 %) was added to four 25 mL beaker and dissolved in HPLC grade dichloromethane, respectively. The resulting solution was poured into four 25 mL volumetric flask and dilute with HPLC grade dichloromethane to volume, respectively, then named as solution I-IV (concentration: 0.659 mM, 0.395 mM, 0.237 mM, 0.142 mM, respectively). Solution I-IV was then directly tested in analytical HPLC.

### Mono-bromocorannulene 2-I:

14.25 mg, 8.55 mg, 5.13 mg, 3.08 mg **2-I** (purity: 98 %) was added to four 25 mL beaker and dissolved in HPLC grade dichloromethane, respectively. The resulting solution was poured into four 25 mL volumetric flask and dilute with HPLC grade dichloromethane to volume, respectively, then named as solution I-IV (concentration: 1.516 mM, 0.910 mM, 0.546 mM, 0.327 mM, respectively). Solution I-IV was then directly tested in analytical HPLC.

### Mono-bromocorannulene 2-Br:

14.25 mg, 6.5 mg, 3.6 mg, 2.6 mg **2-Br** (purity: 95 %) was added to four 10 mL beaker and dissolved in HPLC grade dichloromethane, respectively. The resulting solution was poured into four 10 mL volumetric flask and dilute with HPLC grade dichloromethane to volume, respectively, then named as solution I-IV (concentration: 4.370 mM, 1.973 mM, 1.093 mM, 0.789 mM, respectively). Solution I-IV was then directly tested in analytical HPLC.

### Internal standard 1,3,5-trichlorobenzene:

235.0 mg, 141.0 mg, 84.6 mg, 50.8 mg, 30.5 mg 1,3,5-trichlorobenzene (purity: 99 %) was added to five 10 mL beaker and dissolved in HPLC grade dichloromethane, respectively. The resulting solution was poured into five 25 mL volumetric flask and

dilute with HPLC grade dichloromethane to volume, respectively, then named as solution I-V (concentration: 51.8 mM, 31.1 mM, 18.7 mM, 11.2 mM, 6.7 mM, respectively). Solution I-V was then directly tested in analytical HPLC.

### 3. Yield calculation methods:

With the addition of internal standard (IS):

The standard curves of **1** & **2-I** provided a correlation ( $c_1$ ,  $c_2$ ) between the concentration and the absorption integral ( $A_1$ ,  $A_2$ ) of HPLC:

$$c_1 = f(A_1) \quad c_2 = f'(A_2)$$

The standard curves of IS provided a correlation between the concentration ( $c_0$ ) and the absorption integral ( $A_0$ ) of HPLC:

$$c_0 = f''(A_0)$$

The dilution ratio ( $r$ ) of the sample can be calculated: ( $c_0'$  equals the concentration of IS in the reaction mixture, which is already known)

$$r = c_0/c_0'$$

The concentration of **1** & **2-I** ( $c_1'$ ,  $c_2'$ ) in the reaction mixture thus can be calculated:

$$c_1' = c_1/r \quad c_2' = c_2/r$$

Hence the yield & conversion of each compound can be calculated.

Without the addition of internal standard:

The crude product obtained from each entry is regarded as a mixture consisted of **1**, **2-I** & **2-I<sub>2</sub>**. hence the mixture's total weight ( $m$ ) equals the weight of **1** ( $m_1$ ), the weight of **2-I** ( $m_2$ ) and the weight of **2-I<sub>2</sub>** ( $m_3$ ):

$$m = m_1 + m_2 + m_3$$

A small part of the mixture is sampled to test in HPLC: ( $m'$  represents sample's total mass;  $m_1'$ ,  $m_2'$  and  $m_3'$  represents each compound's mass in the sample;  $r$  represents the sample/mixture ratio)

$$m' = m_1' + m_2' + m_3'$$

$$m'/m = m_1'/m_1 = m_2'/m_2 = m_3'/m_3 = r$$

The amount ( $n'$ ) and concentration ( $c$ ) of each compound in the sample can be calculated: ( $M$  represents molecular weight)

$$n_1' = m_1'/M_1 \quad n_2' = m_2'/M_2 \quad n_3' = m_3'/M_3$$

$$c_1 = n_1'/V \quad c_2 = n_2'/V \quad c_3 = n_3'/V$$

So:

$$m_1' = M_1c_1V = rm_1 \quad m_2' = M_2c_2V = rm_2 \quad m_3' = M_3c_3V = rm_3$$

$$m' = (M_1c_1 + M_2c_2 + M_3c_3)V = rm$$

$$r/V = (M_1c_1 + M_2c_2 + M_3c_3)/m = M_1c_1/m_1 = M_2c_2/m_2 = M_3c_3/m_3$$

The standard curves of **1** & **2-I** provided a correlation between the concentration and the absorption integral (A) of HPLC: (standard curve of **2-I** was applied to **2-I<sub>2</sub>**)

$$c_1 = f(A_1) \quad c_2 = f'(A_2) \quad c_3 = f'(A_3)$$

According to two equations above, the weight of each compound in the mixture  $m_1$ ,  $m_2$  &  $m_3$  can be solved, hence the yield & conversion of each compound can be calculated.

#### 4. Procedures for Au(III)-catalyzed iodination on **1**

Entry 1:

An oven-dried 35 mL pressure flask was put into the glove-box and cooled down under reduced pressure. Gold(III) chloride (15.2 mg, 0.05 mmol), corannulene **1** (250.0 mg, 1.0 mmol) and *N*-iodosuccinimide (NIS) (225.0 mg, 1.0 mmol) was added into the flask in glove-box. The top of the flask was then covered by a rubber stopper and taken out of the glove-box. 16 mL dichloroethane was injected into the flask using a syringe and the flask was sealed with corresponding Teflon cap. The mixture in flask was stirred at 25 °C for 8 hours before heated to 80 °C and further stirred for 48 hours. Resulted reaction mixture in flask was cooled to room temperature, quenched by 5 mL 10 % NaOH solution and extract by dichloromethane (2×20 mL). The combined organic layer was washed with DI (deionized) water (2×20 mL) and dried using anhydrous Na<sub>2</sub>SO<sub>4</sub>. The solvent was evaporated under reduced pressure and a crude product (mostly consisted of **1**, **2-I** & **2-I<sub>2</sub>**) was obtained. The product was weighed & sampled to test in HPLC.

Entry 2:

An oven-dried 35 mL pressure flask was put into the glove-box and cooled down under reduced pressure. Gold(III) chloride (15.2 mg, 0.05 mmol), corannulene **1** (250.0 mg, 1.0 mmol) and *N*-iodosuccinimide (NIS) (270.0 mg, 1.0 mmol) was added into the flask in glove-box. The top of the flask was then covered by a rubber stopper and taken out of the glove-box. 16 mL dichloroethane was injected into the flask using a syringe and the flask was sealed with corresponding Teflon cap. The mixture in flask was stirred at 25 °C for 8 hours before heated to 80 °C and further stirred for 48 hours. Resulted

reaction mixture in flask was cooled to room temperature, quenched by 5 mL 10 % NaOH solution and extract by dichloromethane (2×20 mL). The combined organic layer was washed with DI water (2×20 mL) and dried using anhydrous Na<sub>2</sub>SO<sub>4</sub>. The solvent was evaporated under reduced pressure and a crude product (mostly consisted of **1**, **2-I** & **2-I<sub>2</sub>**) was obtained. The product was weighed & sampled to test in HPLC.

Entry 3:

An oven-dried 35 mL pressure flask was put into the glove-box and cooled down under reduced pressure. Gold(III) chloride (15.2 mg, 0.05 mmol), corannulene **1** (250.0 mg, 1.0 mmol) and *N*-iodosuccinimide (NIS) (337.5 mg, 1.0 mmol) was added into the flask in glove-box. The top of the flask was then covered by a rubber stopper and taken out of the glove-box. 16 mL dichloroethane was injected into the flask using a syringe and the flask was sealed with corresponding Teflon cap. The mixture in flask was stirred at 25 °C for 8 hours before heated to 80 °C and further stirred for 48 hours. Resulted reaction mixture in flask was cooled to room temperature, quenched by 5 mL 10 % NaOH solution and extract by dichloromethane (2×20 mL). The combined organic layer was washed with DI water (2×20 mL) and dried using anhydrous Na<sub>2</sub>SO<sub>4</sub>. The solvent was evaporated under reduced pressure and a crude product (mostly consisted of **1**, **2-I** & **2-I<sub>2</sub>**) was obtained. The product was weighed & sampled to test in HPLC.

## 5. Procedures for catalyst selection tests

Entry 1:

To a 15 mL pressure tube, corannulene **1** (50.0 mg, 0.2 mmol), *N*-iodosuccinimide (NIS) (90.0 mg, 0.4 mmol) and 1,3,5-trichlorobenzene (90.0 mg, 0.4 mmol) was dissolved in 1 mL dichloroethane, then FeCl<sub>3</sub> (6.5 mg, 0.04 mmol) was added and the cap was sealed. The mixture was stirred at 80 °C. The sampling was taken at 0.5 h, 1.0 h, 2.0 h and 4.0 h, each time 10 μL reaction mixture was sampled and diluted by HPLC grade DCM to 1.0 mL. The sample was then test in analytical HPLC to calculate the conversion rate and yield.

Entry 2:

To a 15 mL pressure tube, corannulene **1** (50.0 mg, 0.2 mmol), *N*-iodosuccinimide (NIS) (90.0 mg, 0.4 mmol) and 1,3,5-trichlorobenzene (90.0 mg, 0.4 mmol) was dissolved in 1 mL dichloroethane, then AlCl<sub>3</sub> (5.3 mg, 0.04 mmol) was added and the cap was sealed. The mixture was stirred at 80 °C. The sampling was taken at 0.5 h, 1.0 h, 2.0 h and 4.0 h, each time 10 μL reaction mixture was sampled and diluted by HPLC

grade DCM to 1.0 mL. The sample was then test in analytical HPLC to calculate the conversion rate and yield.

Entry 3:

To a 15 mL pressure tube, corannulene **1** (50.0 mg, 0.2 mmol), *N*-iodosuccinimide (NIS) (90.0 mg, 0.4 mmol) was dissolved in 1 mL dichloroethane, then BF<sub>3</sub>·Et<sub>2</sub>O (5.0 μL, 0.04 mmol) was added and the cap was sealed. The mixture was stirred at 80 °C for 4.0 h, the reaction mixture was then quenched by 5 mL 10 % NaOH solution, extract by DCM (2×5 mL). The organic layer was gathered & washed with water (2×5 mL) and dried using anhydrous Na<sub>2</sub>SO<sub>4</sub>. The solvent was evaporated under vacuum and a crude product (mostly consisted of **1**, **2-I** & **2-I<sub>2</sub>**) was obtained. The product was weighed & sampled to test in HPLC.

Entry 4:

To a 15 mL pressure tube, corannulene **1** (50.0 mg, 0.2 mmol), *N*-iodosuccinimide (NIS) (90.0 mg, 0.4 mmol) was dissolved in 1 mL dichloroethane, the cap was sealed and the mixture was stirred at 80 °C. The sampling was taken at 0 h and 4.0 h, each time 10 μL reaction mixture was sampled and diluted by HPLC grade DCM to 1.0 mL. The sample was then test in analytical HPLC.

## 6. Procedures for condition selection tests

I-1:

To a 15 mL pressure tube, corannulene **1** (50.0 mg, 0.2 mmol), *N*-iodosuccinimide (NIS) (22.5 mg, 0.1 mmol) was dissolved in 1 mL dichloroethane, then BF<sub>3</sub>·Et<sub>2</sub>O (5.0 μL, 0.04 mmol) was added and the cap was sealed. The mixture was stirred at 80 °C for 3 h. Resulted reaction mixture was then allowed to cool to r.t., quenched by 5 mL 10 % NaOH solution and extract by DCM (2×5 mL). The organic layer was gathered & washed with water (2×5 mL) and dried using anhydrous Na<sub>2</sub>SO<sub>4</sub>. The solvent was evaporated under vacuum and a crude product (mostly consisted of **1**, **2-I** & **2-I<sub>2</sub>**) was obtained. The product was weighed & sampled to test in HPLC.

I-2:

To a 15 mL pressure tube, corannulene **1** (50.0 mg, 0.2 mmol), *N*-iodosuccinimide (NIS) (36.0 mg, 0.16 mmol) was dissolved in 1 mL dichloroethane, then BF<sub>3</sub>·Et<sub>2</sub>O (5.0 μL, 0.04 mmol) was added and the cap was sealed. The mixture was stirred at 80 °C for 3 h. Resulted reaction mixture was then allowed to cool to r.t., quenched by 5 mL 10 % NaOH solution and extract by DCM (2×5 mL). The organic layer was gathered &

washed with water (2×5 mL) and dried using anhydrous Na<sub>2</sub>SO<sub>4</sub>. The solvent was evaporated under vacuum and a crude product (mostly consisted of **1**, **2-I** & **2-I<sub>2</sub>**) was obtained. The product was weighed & sampled to test in HPLC.

I-3:

To a 15 mL pressure tube, corannulene **1** (50.0 mg, 0.2 mmol), *N*-iodosuccinimide (NIS) (45.0 mg, 0.2 mmol) was dissolved in 1 mL dichloroethane, then BF<sub>3</sub>·Et<sub>2</sub>O (5.0 μL, 0.04 mmol) was added and the cap was sealed. The mixture was stirred at 80 °C for 3 h. Resulted reaction mixture was then allowed to cool to r.t., quenched by 5 mL 10 % NaOH solution and extract by DCM (2×5 mL). The organic layer was gathered & washed with water (2×5 mL) and dried using anhydrous Na<sub>2</sub>SO<sub>4</sub>. The solvent was evaporated under vacuum and a crude product (mostly consisted of **1**, **2-I** & **2-I<sub>2</sub>**) was obtained. The product was weighed & sampled to test in HPLC.

I-4:

To a 15 mL pressure tube, corannulene **1** (50.0 mg, 0.2 mmol), *N*-iodosuccinimide (NIS) (54.0 mg, 0.24 mmol) was dissolved in 1 mL dichloroethane, then BF<sub>3</sub>·Et<sub>2</sub>O (5.0 μL, 0.04 mmol) was added and the cap was sealed. The mixture was stirred at 80 °C for 3 h. Resulted reaction mixture was then allowed to cool to r.t., quenched by 5 mL 10 % NaOH solution and extract by DCM (2×5 mL). The organic layer was gathered & washed with water (2×5 mL) and dried using anhydrous Na<sub>2</sub>SO<sub>4</sub>. The solvent was evaporated under vacuum and a crude product (mostly consisted of **1**, **2-I** & **2-I<sub>2</sub>**) was obtained. The product was weighed & sampled to test in HPLC.

I-5:

To a 15 mL pressure tube, corannulene **1** (50.0 mg, 0.2 mmol), *N*-iodosuccinimide (NIS) (67.5 mg, 0.3 mmol) was dissolved in 1 mL dichloroethane, then BF<sub>3</sub>·Et<sub>2</sub>O (5.0 μL, 0.04 mmol) was added and the cap was sealed. The mixture was stirred at 80 °C for 3 h. Resulted reaction mixture was then allowed to cool to r.t., quenched by 5 mL 10 % NaOH solution and extract by DCM (2×5 mL). The organic layer was gathered & washed with water (2×5 mL) and dried using anhydrous Na<sub>2</sub>SO<sub>4</sub>. The solvent was evaporated under vacuum and a crude product (mostly consisted of **1**, **2-I** & **2-I<sub>2</sub>**) was obtained. The product was weighed & sampled to test in HPLC.

I-6:

To a 15 mL pressure tube, corannulene **1** (50.0 mg, 0.2 mmol), *N*-iodosuccinimide (NIS) (90.0 mg, 0.4 mmol) was dissolved in 1 mL dichloroethane, then BF<sub>3</sub>·Et<sub>2</sub>O (5.0 μL, 0.04 mmol) was added and the cap was sealed. The mixture was stirred at 80 °C for

3 h. Resulted reaction mixture was then allowed to cool to r.t., quenched by 5 mL 10 % NaOH solution and extract by DCM (2×5 mL). The organic layer was gathered & washed with water (2×5 mL) and dried using anhydrous Na<sub>2</sub>SO<sub>4</sub>. The solvent was evaporated under vacuum and a crude product (mostly consisted of **1**, **2-I** & **2-I<sub>2</sub>**) was obtained. The product was weighed & sampled to test in HPLC.

I-7:

To a 15 mL pressure tube, corannulene **1** (50.0 mg, 0.2 mmol), *N*-iodosuccinimide (NIS) (45.0 mg, 0.2 mmol) was dissolved in 1 mL dichloroethane, then BF<sub>3</sub>·Et<sub>2</sub>O (10.0 μL, 0.08 mmol) was added and the cap was sealed. The mixture was stirred at 80 °C for 0.5 h. Resulted reaction mixture was then allowed to cool to r.t., quenched by 5 mL 10 % NaOH solution and extract by DCM (2×5 mL). The organic layer was gathered & washed with water (2×5 mL) and dried using anhydrous Na<sub>2</sub>SO<sub>4</sub>. The solvent was evaporated under vacuum and a crude product (mostly consisted of **1**, **2-I** & **2-I<sub>2</sub>**) was obtained. The product was weighed & sampled to test in HPLC.

I-8:

To a 15 mL pressure tube, corannulene **1** (50.0 mg, 0.2 mmol), *N*-iodosuccinimide (NIS) (45.0 mg, 0.2 mmol) was dissolved in 1 mL dichloroethane, then BF<sub>3</sub>·Et<sub>2</sub>O (15.0 μL, 0.12 mmol) was added and the cap was sealed. The mixture was stirred at 80 °C for 0.5 h. Resulted reaction mixture was then allowed to cool to r.t., quenched by 5 mL 10 % NaOH solution and extract by DCM (2×5 mL). The organic layer was gathered & washed with water (2×5 mL) and dried using anhydrous Na<sub>2</sub>SO<sub>4</sub>. The solvent was evaporated under vacuum and a crude product (mostly consisted of **1**, **2-I** & **2-I<sub>2</sub>**) was obtained. The product was weighed & sampled to test in HPLC.

I-9:

To a 15 mL pressure tube, corannulene **1** (50.0 mg, 0.2 mmol), *N*-iodosuccinimide (NIS) (45.0 mg, 0.2 mmol) was dissolved in 1 mL dichloroethane, then BF<sub>3</sub>·Et<sub>2</sub>O (20.0 μL, 0.16 mmol) was added and the cap was sealed. The mixture was stirred at 80 °C for 0.5 h. Resulted reaction mixture was then allowed to cool to r.t., quenched by 5 mL 10 % NaOH solution and extract by DCM (2×5 mL). The organic layer was gathered & washed with water (2×5 mL) and dried using anhydrous Na<sub>2</sub>SO<sub>4</sub>. The solvent was evaporated under vacuum and a crude product (mostly consisted of **1**, **2-I** & **2-I<sub>2</sub>**) was obtained. The product was weighed & sampled to test in HPLC.

I-10:

To a 15 mL pressure tube, corannulene **1** (50.0 mg, 0.2 mmol), *N*-iodosuccinimide



(NIS) (45.0 mg, 0.2 mmol) was dissolved in 1 mL dichloroethane, then  $\text{BF}_3 \cdot \text{Et}_2\text{O}$  (25.0  $\mu\text{L}$ , 0.2 mmol) was added and the cap was sealed. The mixture was stirred at 80 °C for 0.5 h. Resulted reaction mixture was then allowed to cool to r.t., quenched by 5 mL 10 % NaOH solution and extract by DCM (2 $\times$ 5 mL). The organic layer was gathered & washed with water (2 $\times$ 5 mL) and dried using anhydrous  $\text{Na}_2\text{SO}_4$ . The solvent was evaporated under vacuum and a crude product (mostly consisted of **1**, **2-I** & **2-I<sub>2</sub>**) was obtained. The product was weighed & sampled to test in HPLC.

I-11:

To a 15 mL pressure tube, corannulene **1** (50.0 mg, 0.2 mmol), *N*-iodosuccinimide (NIS) (45.0 mg, 0.2 mmol) was dissolved in 1 mL dichloroethane, then  $\text{BF}_3 \cdot \text{Et}_2\text{O}$  (25.0  $\mu\text{L}$ , 0.2 mmol) was added and the cap was sealed. The mixture was stirred at r.t. for 12 h. Resulted reaction mixture was then allowed to cool to r.t., quenched by 5 mL 10 % NaOH solution and extract by DCM (2 $\times$ 5 mL). The organic layer was gathered & washed with water (2 $\times$ 5 mL) and dried using anhydrous  $\text{Na}_2\text{SO}_4$ . The solvent was evaporated under vacuum and a crude product (mostly consisted of **1**, **2-I** & **2-I<sub>2</sub>**) was obtained. The product was weighed & sampled to test in HPLC.

I-12:

To a 15 mL pressure tube, corannulene **1** (50.0 mg, 0.2 mmol), *N*-iodosuccinimide (NIS) (45.0 mg, 0.2 mmol) was dissolved in 1 mL dichloroethane, then  $\text{BF}_3 \cdot \text{Et}_2\text{O}$  (10.0  $\mu\text{L}$ , 0.08 mmol) was added and the cap was sealed. The mixture was stirred at r.t. for 12 h. Resulted reaction mixture was then allowed to cool to r.t., quenched by 5 mL 10 % NaOH solution and extract by DCM (2 $\times$ 5 mL). The organic layer was gathered & washed with water (2 $\times$ 5 mL) and dried using anhydrous  $\text{Na}_2\text{SO}_4$ . The solvent was evaporated under vacuum and a crude product (mostly consisted of **1**, **2-I** & **2-I<sub>2</sub>**) was obtained. The product was weighed & sampled to test in HPLC.

I-13 (gram-scale):

To a 50 mL round-bottom flask, corannulene **1** (1.0 g, 4.0 mmol), *N*-iodosuccinimide (NIS) (0.9 g, 4.0 mmol) was dissolved in 20 mL dichloroethane, then  $\text{BF}_3 \cdot \text{Et}_2\text{O}$  (0.2 ml, 1.6 mmol) was added. The mixture was stirred at r.t. for 12 h and then quenched by 50 mL 10 % NaOH solution, extract by DCM (2 $\times$ 50 mL). The organic layer was gathered & washed with water (2 $\times$ 50 mL) and dried using anhydrous  $\text{Na}_2\text{SO}_4$ . The solvent was evaporated under vacuum and a crude product was obtained. The conversion rate (87.9 %) and yield of **2-I** (76.3 %, 86.9 % b.r.s.m.) was determined by analytical HPLC.

Br-1 (gram-scale):

To a 50 mL round-bottom flask, corannulene **1** (1.0 g, 4.0 mmol), *N*-bromosuccinimide (NBS) (712.0 mg, 4.0 mmol) was dissolved in 20 mL dichloroethane, then  $\text{BF}_3 \cdot \text{Et}_2\text{O}$  (0.2 ml, 1.6 mmol) was added. The mixture was stirred at r.t. for 12 h and then quenched by 50 mL 10 % NaOH solution, extract by DCM (2×50 mL). The organic layer was gathered & washed with water (2×50 mL) and dried using anhydrous  $\text{Na}_2\text{SO}_4$ . The solvent was evaporated under vacuum and a crude product (total weight: 1.21 g) was obtained. The conversion rate (79.1%) and yield of **2-Br** (69.3 %, 87.5 % b.r.s.m.) was determined by analytical HPLC.

## 7. Procedures for purification of **2-I** and **2-Br**

Purification of **2-I**:

The gram-scale reaction (I-13) was repeated twice and the combined crude reaction mixture (total weight: 2.85 g) of **1**, **2-I** & **2-I<sub>2</sub>** was packed on a short silica plug and separated in to two portions (portion a: total weight 900 mg, 90 % **2-I**/ 10 % **2-I<sub>2</sub>**, portion b: total weight 1900 mg, 13 % **1**/ 86 % **2-I**/ 1 % **2-I<sub>2</sub>**). Portion a was then dissolved in HPLC grade DCM, mixed with kieselguhr and went on separation using Combiflash-Rf, gives 640 mg 93 % pure **2-I**. Multiple further separation attempt afforded about 200 mg 96 % pure **2-I**. <sup>1</sup>H-NMR data of **2-I** is consistent with reported values.

Purification of **2-Br**:

The crude reaction mixture of **1**, **2-Br** & **2-Br<sub>2</sub>** was packed on a short silica plug and separated in to two portions (portion a: total weight 515 mg, 90 % **2-Br**/ 10 % **2-Br<sub>2</sub>**, portion b: total weight 685 mg, 30 % **1**/ 65 % **2-Br**/ 5 % **2-Br<sub>2</sub>**). Portion a and b was then dissolved in HPLC grade DCM, mixed with kieselguhr and went on further separation using Combiflash-Rf, respectively. The separation process obtained 955 mg 98 % pure **2-Br** in total, as well as recovered 200 mg 98 % pure **1**. <sup>1</sup>H-NMR data of **2-Br** is consistent with reported values.

## 8. Preparation of *sym*-pentachlorocorannulene **3**

Corannulene **1** (3 g, 12 mmol) dissolved in dichloromethane (156 mL) was cooled to -78 °C and iodine monochloride (25.3 g, 156 mmol) was added. The mixture was allowed to warm to room temperature over 10 hours and stirred an additional 3 days and 14 hours at ambient temperature. The solution was quenched by 156 mL 10% Vitamin C solution and washed with 300 mL water twice. The resulting yellow suspension was evaporated to dryness and a crude product (5.3 g, 35 % pure) was obtained. Triturated 3 times with cyclohexane (100 mL), the resulting yellowish solid (2.9 g, 58% pure) was recrystallized from 1,2-dichlorobenzene twice with a total amount of 500 mL to yield a pale-yellow solid (1.86 g, 85 % pure, 31 %). <sup>1</sup>H-NMR data is consistent with reported values.

## 9. Preparation of overchlorinated corannulene **6**

The filtrate of **2** after digesting in cyclohexane was separated by column chromatography with eluent of cyclohexane and used without further purification.

## 10. Preparation of 1,4,6,9-tetrakis(4-methoxyphenylthio)corannulene

**7**

To a 10 mL round bottom flask equipped with a reflux condenser, DMI (5 mL, dried over MS) was added. 4-methylthiophenol (162 mg, 1.31 mmol) and sodium hydride (44 mg, 1.09 mmol, 60 % in mineral oil) were added and allowed to stir at room temperature for 10 minutes. **6** (50 mg, 0.110 mmol) was added and the solution was warmed to 60 °C for 18 hours. The solution was cooled, extracted three times with ethylacetate (15 mL) and washed with water. The organic layer was dried over magnesium sulfate, filtered, and evaporated. The product was purified by prep-TLC with hexane/dichloromethane (1:5) as eluent. The yield of a light-yellow solid was 10 mg (10 %).

Four tetrakis(phenylthio)corannulene are possible isomers. However, NOESY shows no cross peaks between the protons on corannulene ring. Compound **7a** is the possible structure through this point. Also, in compound **7b**, **7c** and **7d** there are two, one and one repulsion between the adjacent benzene rings. Compound **7a** is the most

reasonable structure from the perspective of energy.

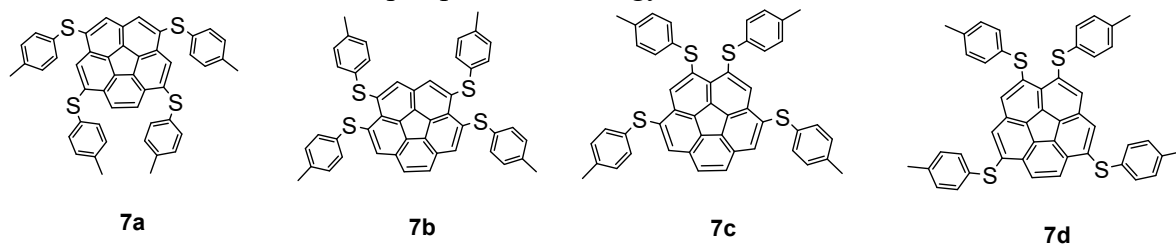

## 9. HPLC traces & data plotting of standard curves

### 9.1 HPLC traces & data plotting of standard curves of compound 1

Trace 1: concentration 1.098 mM

Chromatogram:

mV

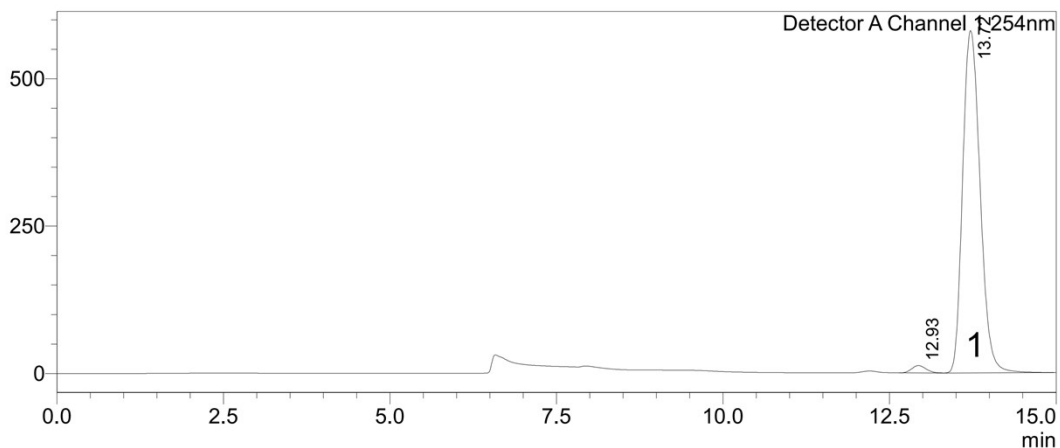

Peak Table:

Detector A Channel 1 254nm

| Peak  | Ret. Time | Area     | Height | Area%  | Compound Name |
|-------|-----------|----------|--------|--------|---------------|
| 1     | 12.93     | 186000   | 12486  | 1.72   |               |
| 2     | 13.72     | 10609733 | 580653 | 98.28  |               |
| Total |           | 10795733 | 593139 | 100.00 |               |

Trace 2: concentration 0.659 mM

Chromatogram:

mV

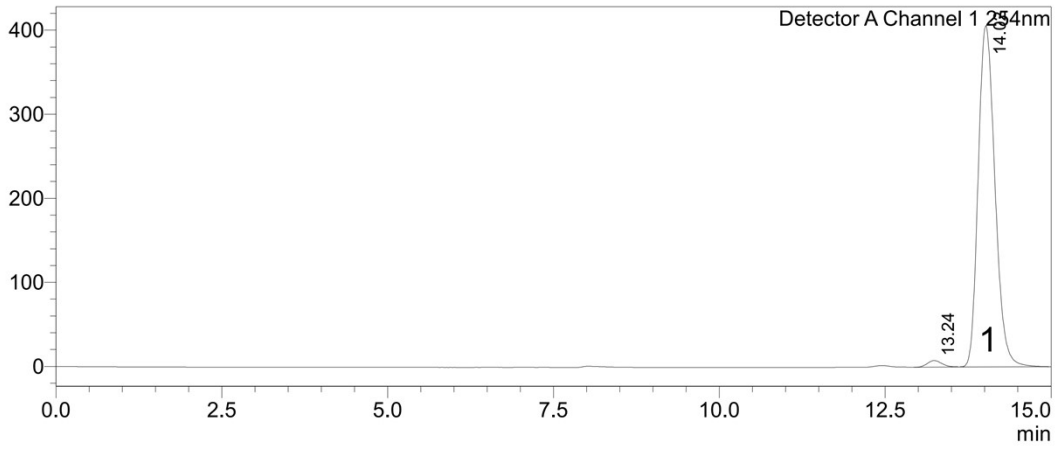

Peak Table:

Detector A Channel 1 254nm

| Peak  | Ret. Time | Area    | Height | Area%  | Compound Name |
|-------|-----------|---------|--------|--------|---------------|
| 1     | 13.24     | 119833  | 7822   | 1.65   |               |
| 2     | 14.02     | 7141018 | 405855 | 98.35  |               |
| Total |           | 7260852 | 413677 | 100.00 |               |

Trace 3: concentration 0.395 mM

Chromatogram:

mV

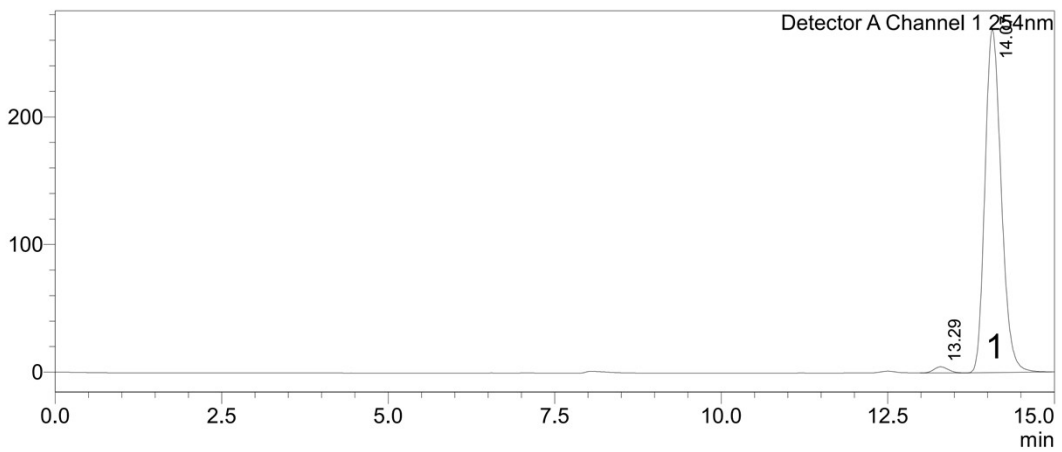

Peak Table:

Detector A Channel 1 254nm

| Peak  | Ret. Time | Area    | Height | Area%  | Compound Name |
|-------|-----------|---------|--------|--------|---------------|
| 1     | 13.29     | 72936   | 4844   | 1.57   |               |
| 2     | 14.07     | 4585688 | 268479 | 98.43  |               |
| Total |           | 4658624 | 273322 | 100.00 |               |

Trace 4: concentration 0.237 mM

Chromatogram:

mV

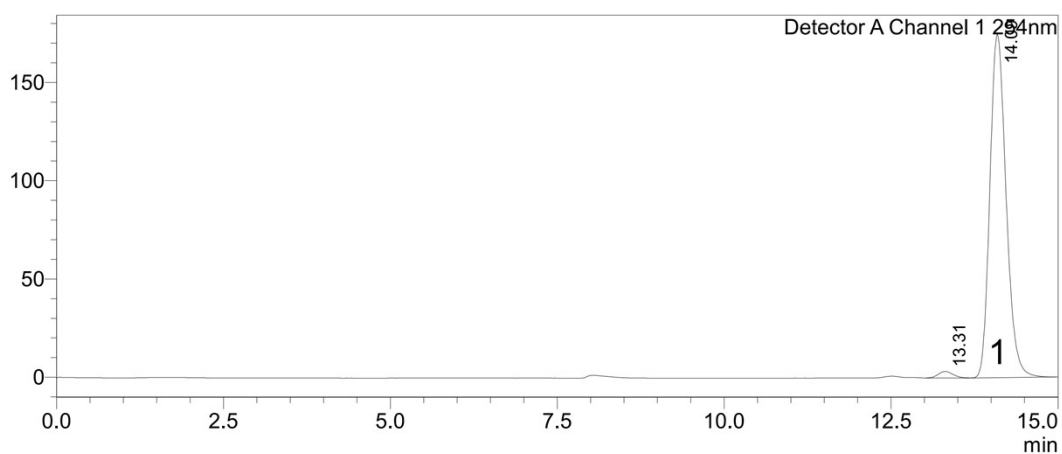

Peak Table:

Detector A Channel 1 254nm

| Peak  | Ret. Time | Area    | Height | Area%  | Compound Name |
|-------|-----------|---------|--------|--------|---------------|
| 1     | 13.31     | 49746   | 3288   | 1.66   |               |
| 2     | 14.09     | 2952387 | 174646 | 98.34  |               |
| Total |           | 3002133 | 177934 | 100.00 |               |

Trace 5: concentration 0.142 mM

Chromatogram:

mV

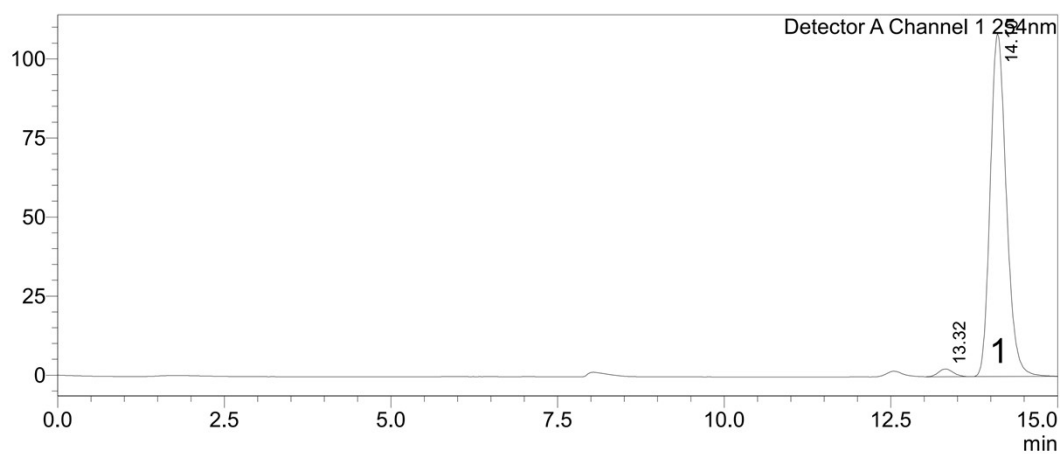

Peak Table:

Detector A Channel 1 254nm

| Peak  | Ret. Time | Area    | Height | Area%  | Compound Name |
|-------|-----------|---------|--------|--------|---------------|
| 1     | 13.32     | 37793   | 2446   | 2.03   |               |
| 2     | 14.10     | 1820434 | 108323 | 97.97  |               |
| Total |           | 1858227 | 110769 | 100.00 |               |

Standard curve 1-1: linear fitting of trace 2-5

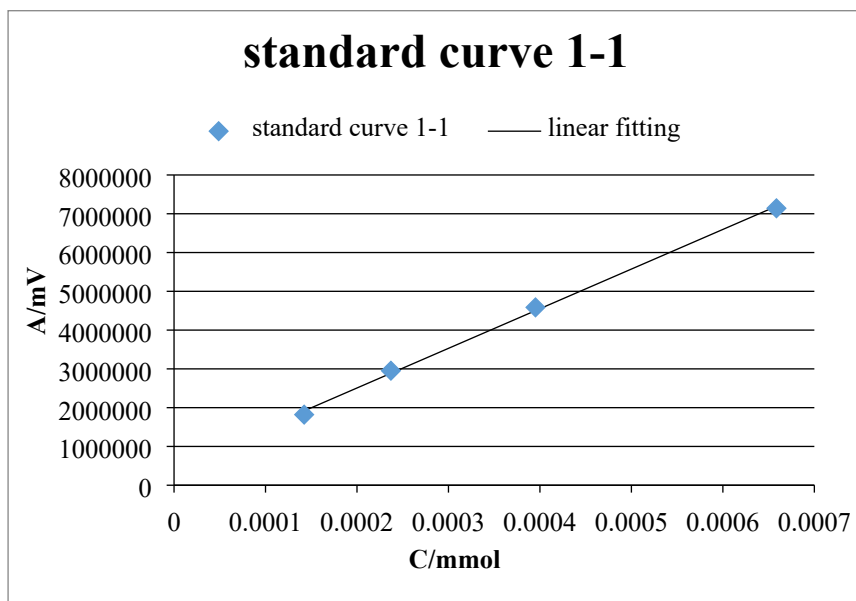

Standard curve 1-2: linear fitting of trace 1-3

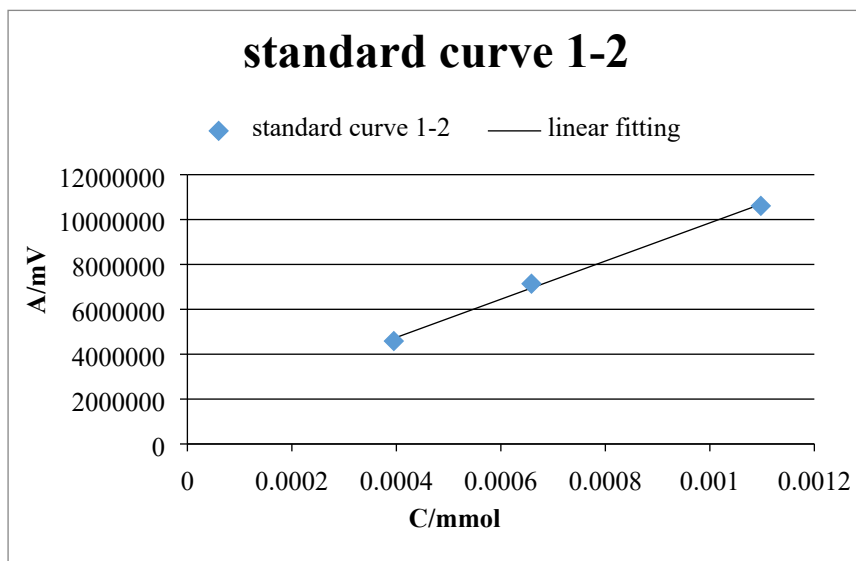

## 9.2 HPLC traces & data plotting of standard curves of compound 2-I

Trace 1: concentration 1.516 mM

Chromatogram:

mV

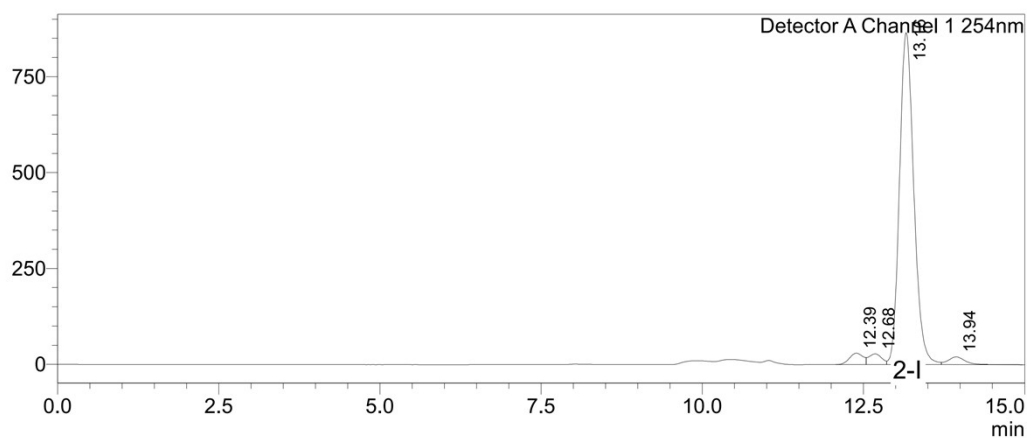

Peak Table:

Detector A Channel 1 254nm

| Peak  | Ret. Time | Area     | Height | Area%  | Compound Name |
|-------|-----------|----------|--------|--------|---------------|
| 1     | 12.39     | 444940   | 29896  | 3.04   |               |
| 2     | 12.68     | 394365   | 28069  | 2.70   |               |
| 3     | 13.16     | 13402375 | 865156 | 91.68  |               |
| 4     | 13.94     | 377710   | 20267  | 2.58   |               |
| Total |           | 14619389 | 943388 | 100.00 |               |

Trace 2: concentration 0.910 mM

Chromatogram:

mV

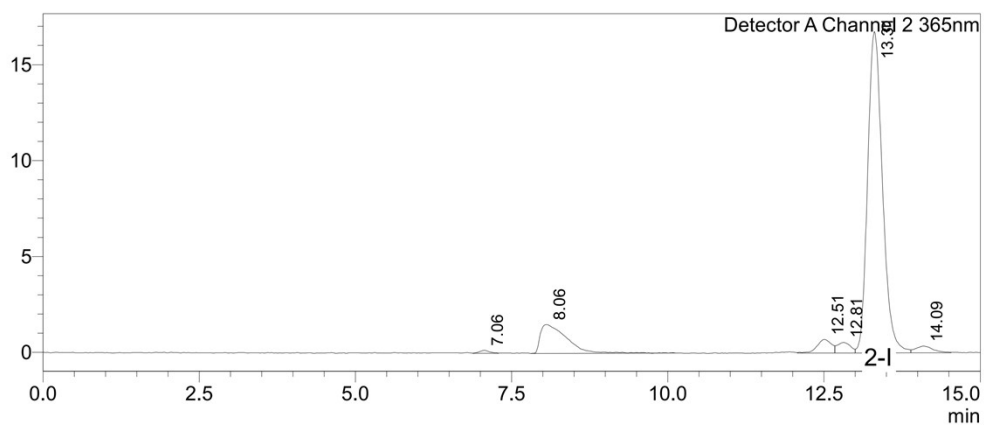

Peak Table:

Detector A Channel 1 254nm

| Peak  | Ret. Time | Area    | Height | Area%  | Compound Name |
|-------|-----------|---------|--------|--------|---------------|
| 1     | 12.52     | 305976  | 19966  | 3.36   |               |
| 2     | 12.82     | 244068  | 17349  | 2.68   |               |
| 3     | 13.30     | 8286440 | 525592 | 90.91  |               |
| 4     | 14.10     | 278729  | 14942  | 3.06   |               |
| Total |           | 9115213 | 577848 | 100.00 |               |



Trace 3: concentration 0.546 mM

Chromatogram:

mV

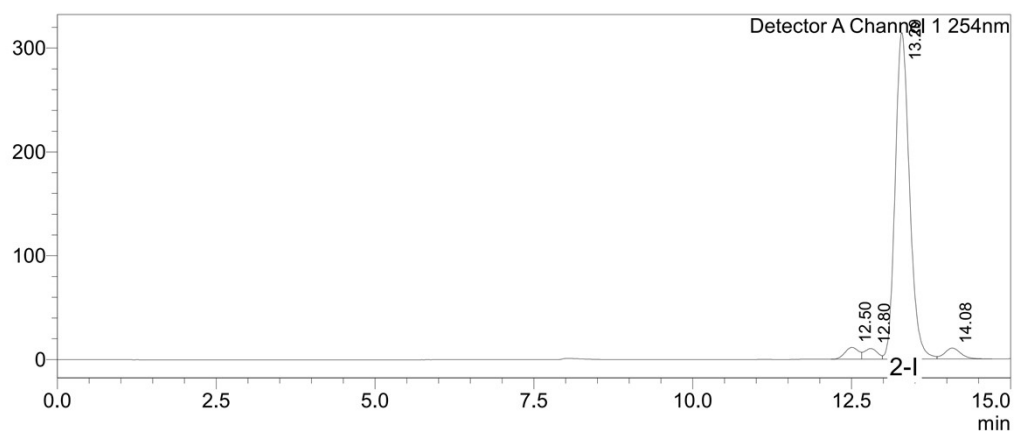

Peak Table:

Detector A Channel 1 254nm

| Peak  | Ret. Time | Area    | Height | Area%  | Compound Name |
|-------|-----------|---------|--------|--------|---------------|
| 1     | 12.50     | 171394  | 11369  | 3.15   |               |
| 2     | 12.80     | 147257  | 10252  | 2.70   |               |
| 3     | 13.29     | 4940277 | 314251 | 90.71  |               |
| 4     | 14.08     | 187108  | 10551  | 3.44   |               |
| Total |           | 5446036 | 346423 | 100.00 |               |

Trace 4: concentration 0.327 mM

Chromatogram:

mV

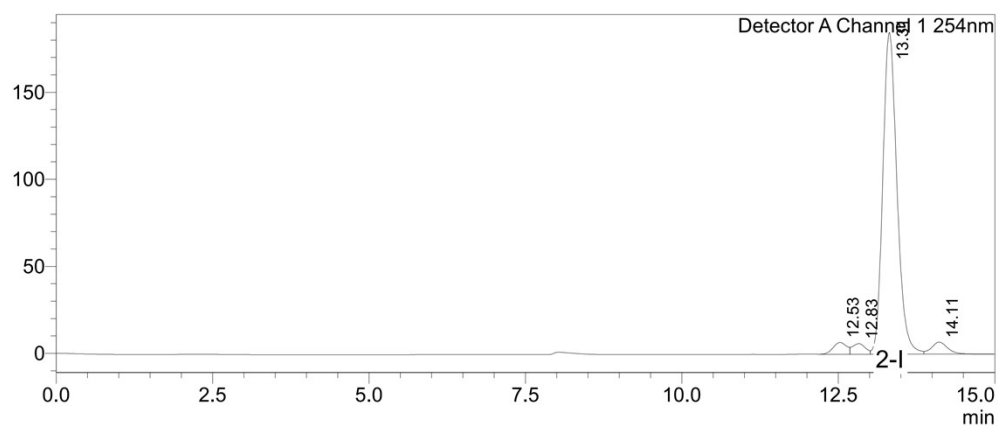

Peak Table:

Detector A Channel 1 254nm

| Peak  | Ret. Time | Area    | Height | Area%  | Compound Name |
|-------|-----------|---------|--------|--------|---------------|
| 1     | 12.53     | 102572  | 6748   | 3.17   |               |
| 2     | 12.83     | 87298   | 6075   | 2.70   |               |
| 3     | 13.31     | 2920016 | 184838 | 90.20  |               |
| 4     | 14.11     | 127524  | 6962   | 3.94   |               |
| Total |           | 3237410 | 204623 | 100.00 |               |

Standard curve 2-I: linear fitting of trace 1-4

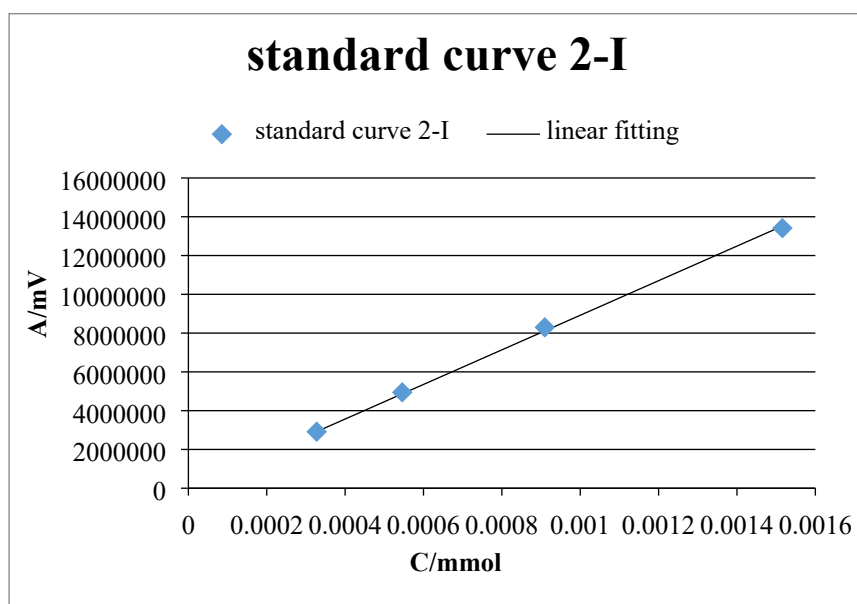

### 9.3 HPLC traces & data plotting of standard curves of compound 2-Br

Trace 1: concentration 4.370 mM

Chromatogram:

mV

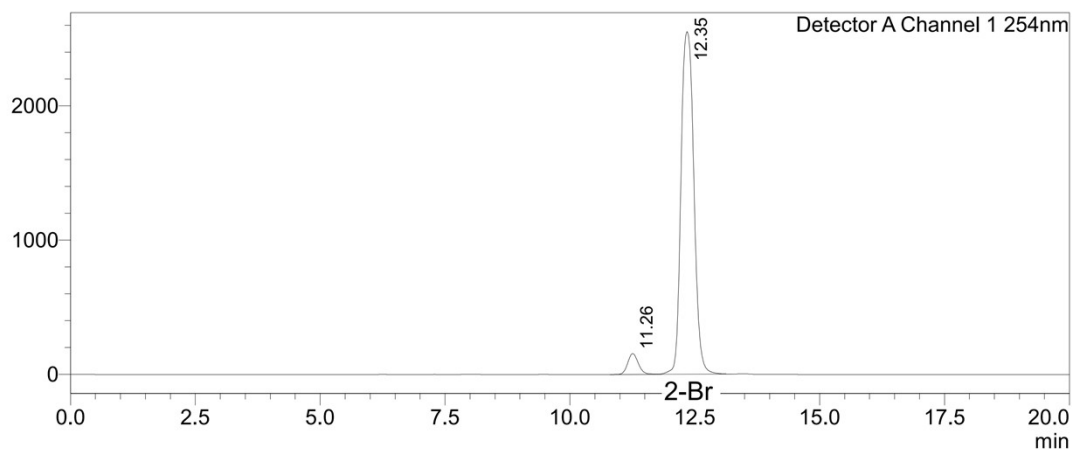

Peak Table:

Detector A Channel 1 254nm

| Peak  | Ret. Time | Area     | Height  | Area%  | Compound Name |
|-------|-----------|----------|---------|--------|---------------|
| 1     | 11.26     | 2308270  | 155391  | 4.81   |               |
| 2     | 12.35     | 45724206 | 2549472 | 95.19  |               |
| Total |           | 48032477 | 2704864 | 100.00 |               |

Trace 2: concentration 1.973 mM

Chromatogram:

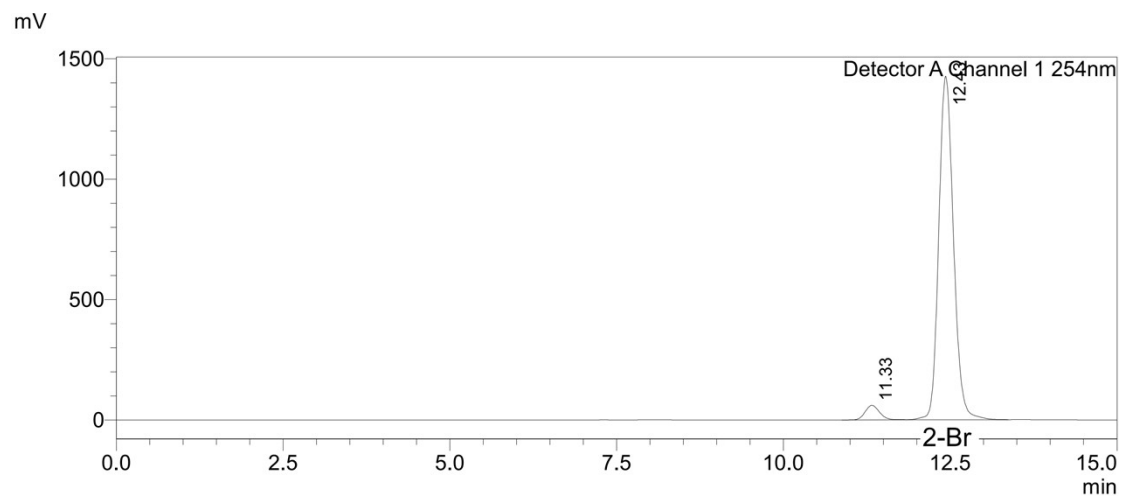

Peak Table:

Detector A Channel 1 254nm

| Peak  | Ret. Time | Area     | Height  | Area%  | Compound Name |
|-------|-----------|----------|---------|--------|---------------|
| 1     | 11.33     | 914801   | 60672   | 4.00   |               |
| 2     | 12.43     | 21938526 | 1427358 | 96.00  |               |
| Total |           | 22853327 | 1488030 | 100.00 |               |

Trace 3: concentration 1.093 mM

Chromatogram:

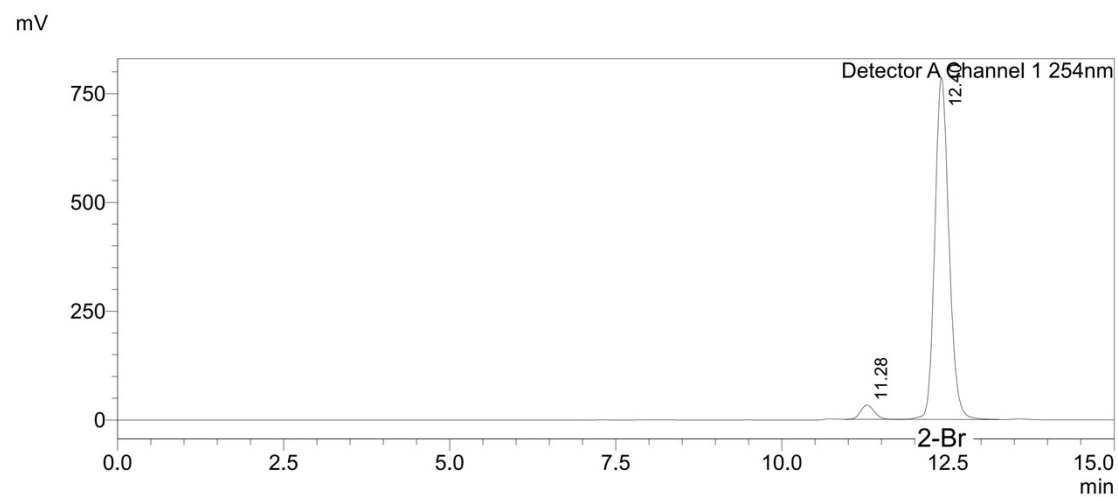

Peak Table:

Detector A Channel 1 254nm

| Peak  | Ret. Time | Area     | Height | Area%  | Compound Name |
|-------|-----------|----------|--------|--------|---------------|
| 1     | 11.28     | 470154   | 32836  | 3.88   |               |
| 2     | 12.40     | 11641601 | 784965 | 96.12  |               |
| Total |           | 12111755 | 817801 | 100.00 |               |

Trace 4: concentration 0.789 mM

Chromatogram:

mV

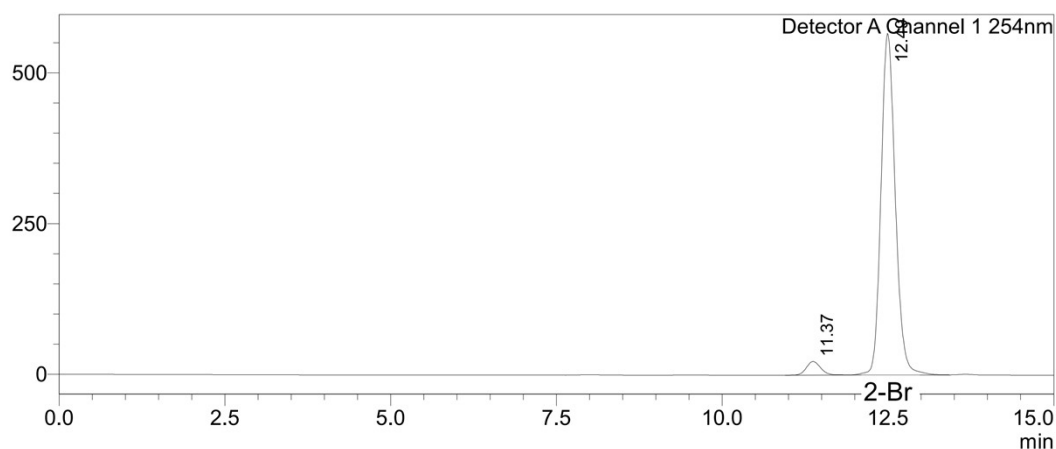

Peak Table:

Detector A Channel 1 254nm

| Peak  | Ret. Time | Area    | Height | Area%  | Compound Name |
|-------|-----------|---------|--------|--------|---------------|
| 1     | 11.37     | 341953  | 22679  | 3.86   |               |
| 2     | 12.49     | 8512837 | 566426 | 96.14  |               |
| Total |           | 8854790 | 589105 | 100.00 |               |

Standard curve 2-Br: linear fitting of trace 1-4

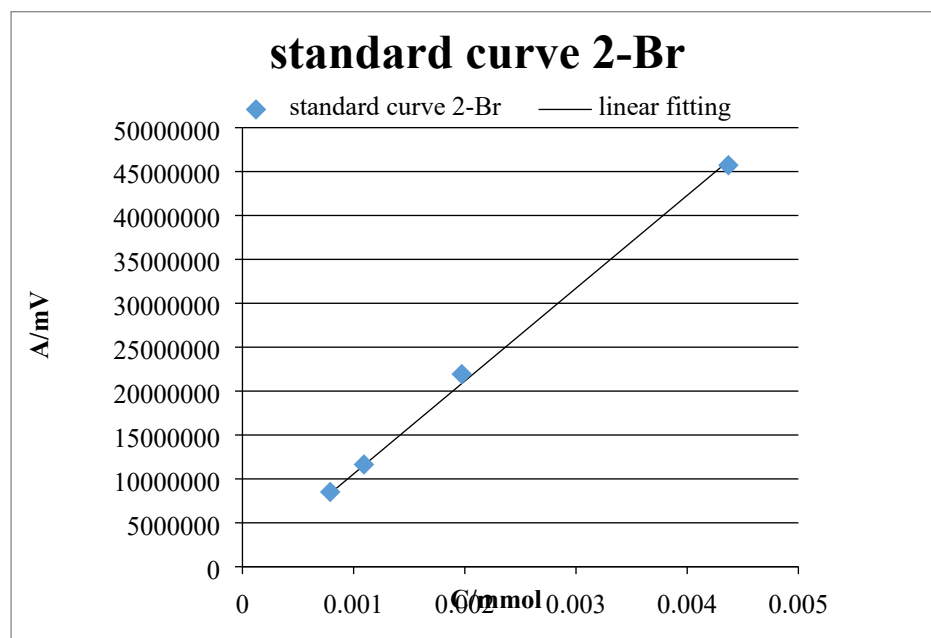

#### 9.4 HPLC traces & data plotting of standard curves of internal standard 1,3,5-trichlorobenzene

IS: internal standard

Trace 1: concentration 51.8 mM

Chromatogram:

mV

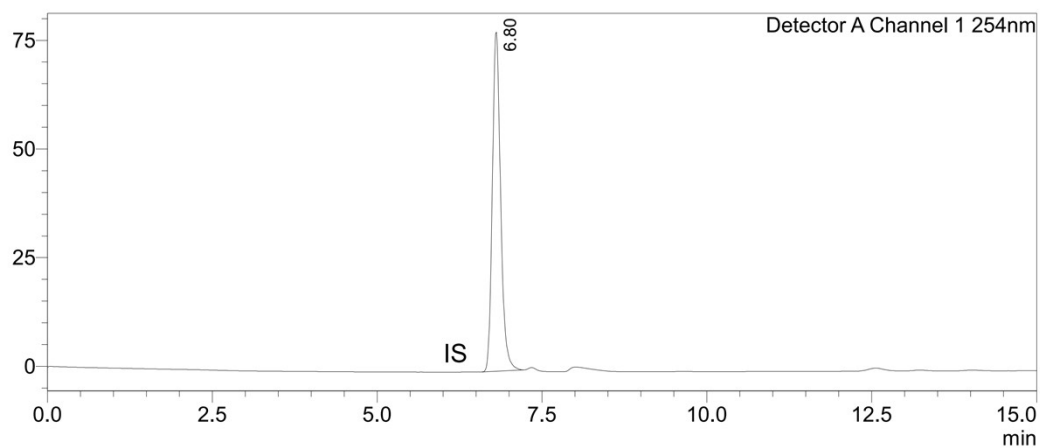

Peak Table:

Detector A Channel 1 254nm

| Peak  | Ret. Time | Area   | Height | Area%  | Compound Name |
|-------|-----------|--------|--------|--------|---------------|
| 1     | 6.80      | 683770 | 77990  | 100.00 |               |
| Total |           | 683770 | 77990  | 100.00 |               |

Trace 2: concentration 31.1 mM

Chromatogram:

mV

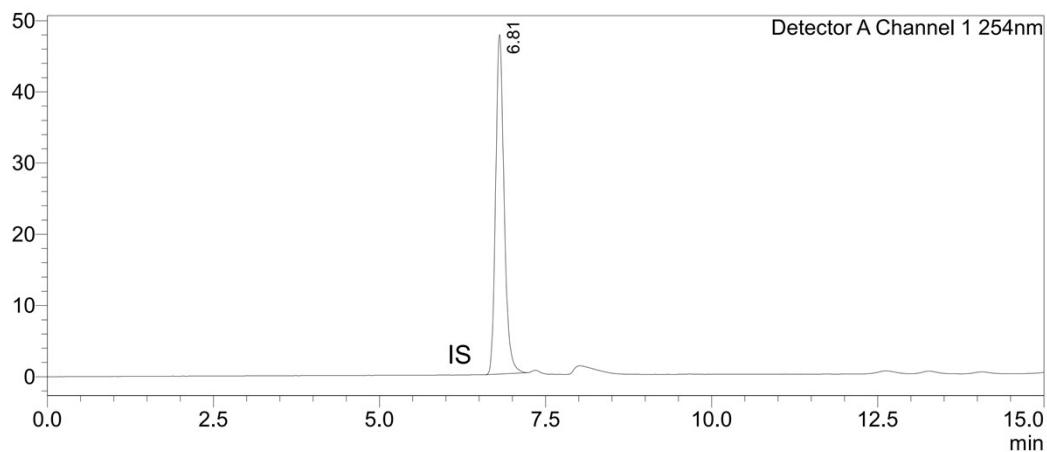

Peak Table:

Detector A Channel 1 254nm

| Peak  | Ret. Time | Area   | Height | Area%  | Compound Name |
|-------|-----------|--------|--------|--------|---------------|
| 1     | 6.81      | 424109 | 47648  | 100.00 |               |
| Total |           | 424109 | 47648  | 100.00 |               |

Trace 3: concentration 18.7 mM

Chromatogram:

mV

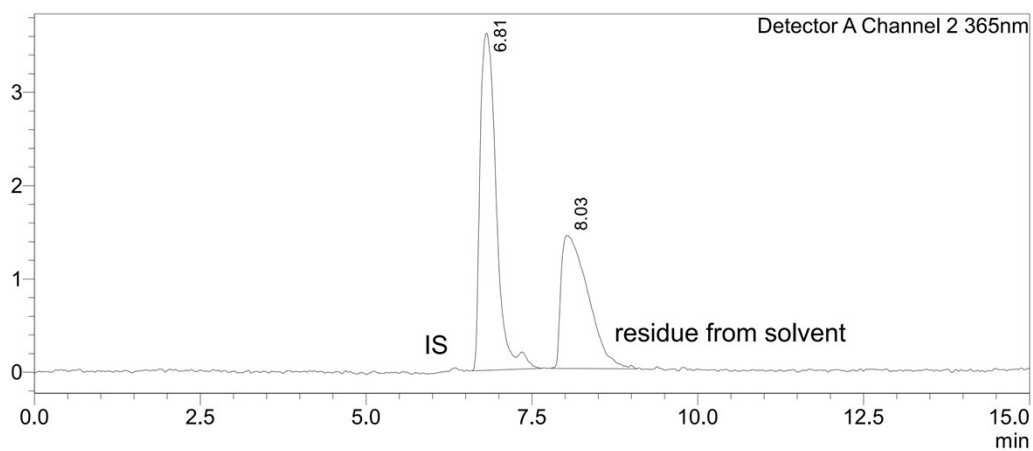

Peak Table:

Detector A Channel 1 254nm

| Peak  | Ret. Time | Area   | Height | Area%  | Compound Name |
|-------|-----------|--------|--------|--------|---------------|
| 1     | 6.81      | 267947 | 29578  | 100.00 |               |
| Total |           | 267947 | 29578  | 100.00 |               |

Trace 4: concentration 11.2 mM

Chromatogram:

mV

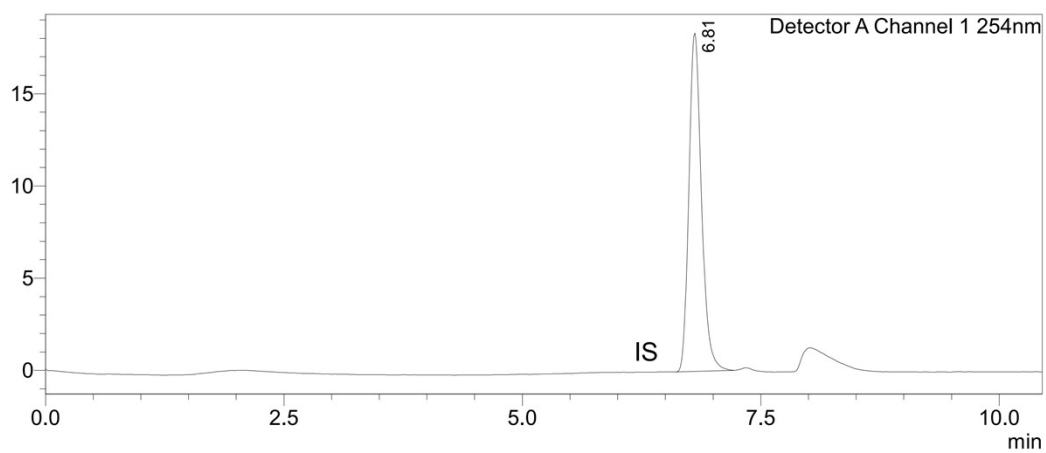

Peak Table:

Detector A Channel 1 254nm

| Peak  | Ret. Time | Area   | Height | Area%  | Compound Name |
|-------|-----------|--------|--------|--------|---------------|
| 1     | 6.81      | 168452 | 18329  | 100.00 |               |
| Total |           | 168452 | 18329  | 100.00 |               |

Trace 5: concentration 6.7 mM

Chromatogram:

mV

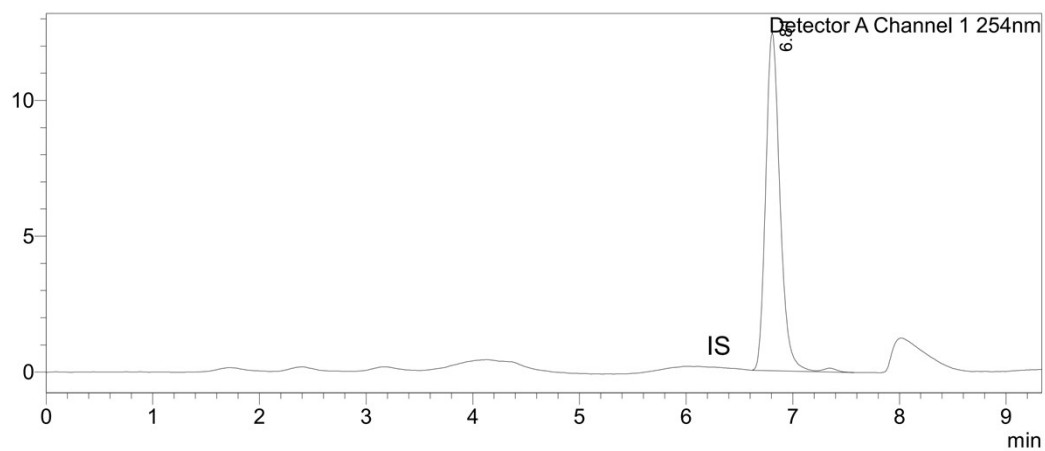

Peak Table:

Detector A Channel 1 254nm

| Peak  | Ret. Time | Area   | Height | Area%  | Compound Name |
|-------|-----------|--------|--------|--------|---------------|
| 1     | 6.81      | 115931 | 12446  | 100.00 |               |
| Total |           | 115931 | 12446  | 100.00 |               |

Standard curve internal standard: linear fitting of trace 1-5

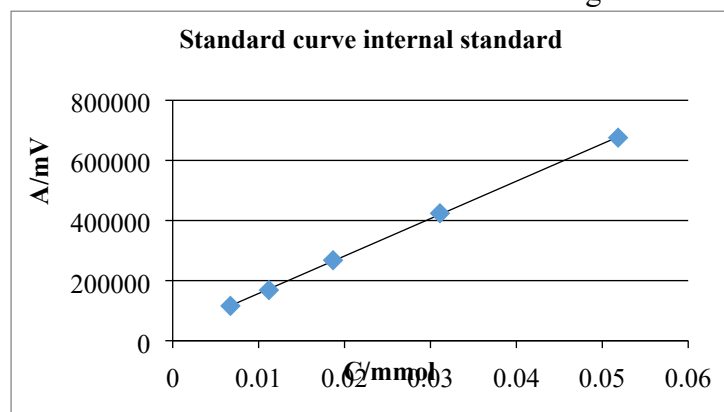

## 10. HPLC traces of catalyst selection tests

### 10.1 HPLC traces of Table 1, Entry 1

Trace 1: reaction time 0.5 h

Chromatogram:

mV

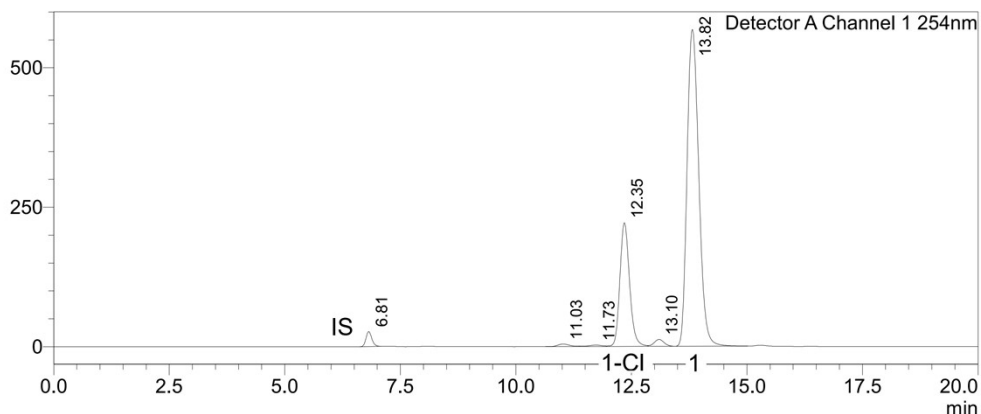

Peak Table:

Detector A Channel 1 254nm

| Peak  | Ret. Time | Area     | Height | Area%  | Compound Name |
|-------|-----------|----------|--------|--------|---------------|
| 1     | 6.81      | 235983   | 26855  | 1.71   |               |
| 2     | 11.03     | 81160    | 4555   | 0.59   |               |
| 3     | 11.73     | 53211    | 2545   | 0.39   |               |
| 4     | 12.35     | 3224060  | 221879 | 23.39  |               |
| 5     | 13.10     | 184170   | 12378  | 1.34   |               |
| 6     | 13.82     | 10002685 | 567856 | 72.58  |               |
| Total |           | 13781269 | 836070 | 100.00 |               |

Trace 2: reaction time 1.0 h

Chromatogram:

mV

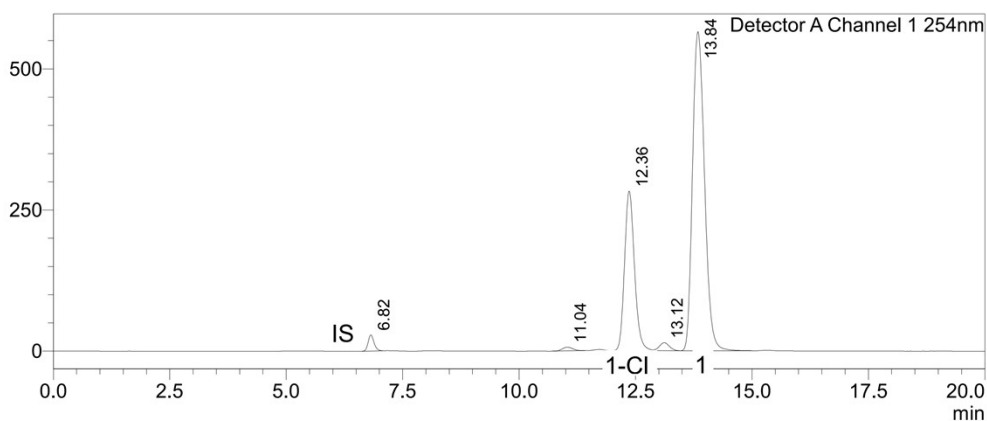

Peak Table:

Detector A Channel 1 254nm

| Peak  | Ret. Time | Area     | Height | Area%  | Compound Name |
|-------|-----------|----------|--------|--------|---------------|
| 1     | 6.82      | 250785   | 28601  | 1.68   |               |
| 2     | 11.04     | 104424   | 6606   | 0.70   |               |
| 3     | 12.36     | 4192033  | 282304 | 28.12  |               |
| 4     | 13.12     | 211698   | 14226  | 1.42   |               |
| 5     | 13.84     | 10150816 | 565090 | 68.08  |               |
| Total |           | 14909757 | 896826 | 100.00 |               |



### Trace 3: reaction time 2.0 h

Chromatogram:

mV

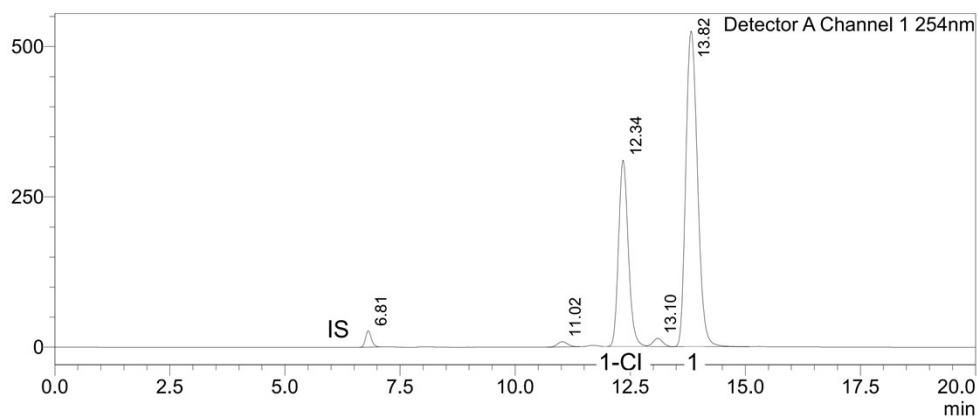

Peak Table:

Detector A Channel 1 254nm

| Peak  | Ret. Time | Area     | Height | Area%  | Compound Name |
|-------|-----------|----------|--------|--------|---------------|
| 1     | 6.81      | 237804   | 27170  | 1.64   |               |
| 2     | 11.02     | 135787   | 8706   | 0.94   |               |
| 3     | 12.34     | 4585992  | 310027 | 31.68  |               |
| 4     | 13.10     | 206442   | 13837  | 1.43   |               |
| 5     | 13.82     | 9312102  | 524965 | 64.32  |               |
| Total |           | 14478125 | 884705 | 100.00 |               |

### Trace 4: reaction time 4.0 h

Chromatogram:

mV

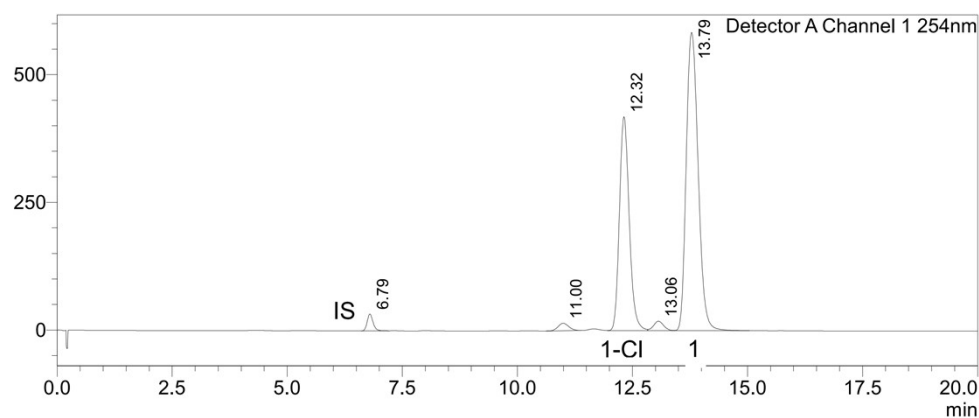

Peak Table:

Detector A Channel 1 254nm

| Peak  | Ret. Time | Area     | Height  | Area%  | Compound Name |
|-------|-----------|----------|---------|--------|---------------|
| 1     | 6.79      | 293153   | 32988   | 1.67   |               |
| 2     | 11.00     | 237766   | 14738   | 1.36   |               |
| 3     | 12.32     | 6203596  | 418818  | 35.43  |               |
| 4     | 13.06     | 274436   | 18363   | 1.57   |               |
| 5     | 13.79     | 10500564 | 583543  | 59.97  |               |
| Total |           | 17509514 | 1068451 | 100.00 |               |

## 10.2 HPLC traces of Table 1, Entry 2

### Trace 1: reaction time 0.5 h

Chromatogram:

mV

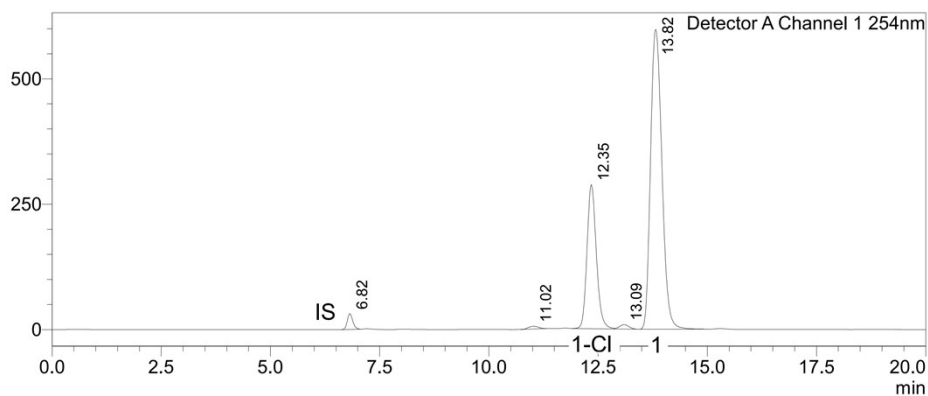

Peak Table:

Detector A Channel 1 254nm

| Peak  | Ret. Time | Area     | Height | Area%  | Compound Name |
|-------|-----------|----------|--------|--------|---------------|
| 1     | 6.82      | 273780   | 31416  | 1.76   |               |
| 2     | 11.02     | 86954    | 5363   | 0.56   |               |
| 3     | 12.35     | 4276231  | 286904 | 27.45  |               |
| 4     | 13.09     | 131353   | 8862   | 0.84   |               |
| 5     | 13.82     | 10811647 | 597749 | 69.39  |               |
| Total |           | 15579966 | 930294 | 100.00 |               |

### Trace 2: reaction time 1.0 h

Chromatogram:

mV

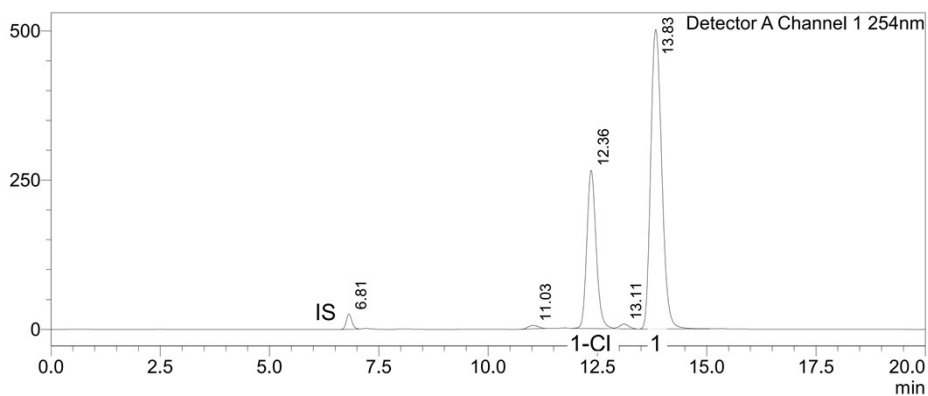

Peak Table:

Detector A Channel 1 254nm

| Peak  | Ret. Time | Area     | Height | Area%  | Compound Name |
|-------|-----------|----------|--------|--------|---------------|
| 1     | 6.81      | 224934   | 25611  | 1.70   |               |
| 2     | 11.03     | 89438    | 5641   | 0.68   |               |
| 3     | 12.36     | 3927332  | 264920 | 29.77  |               |
| 4     | 13.11     | 120184   | 8093   | 0.91   |               |
| 5     | 13.83     | 8830763  | 501802 | 66.94  |               |
| Total |           | 13192651 | 806068 | 100.00 |               |

### Trace 3: reaction time 2.0 h

Chromatogram:

mV

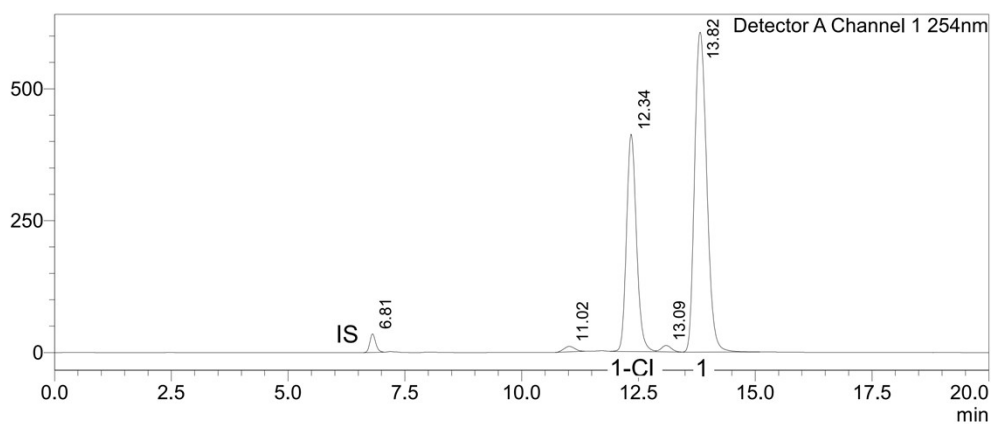

Peak Table:

Detector A Channel 1 254nm

| Peak  | Ret. Time | Area     | Height  | Area%  | Compound Name |
|-------|-----------|----------|---------|--------|---------------|
| 1     | 6.81      | 303920   | 35008   | 1.71   |               |
| 2     | 11.02     | 167266   | 10284   | 0.94   |               |
| 3     | 12.34     | 6134281  | 411820  | 34.49  |               |
| 4     | 13.09     | 180810   | 12172   | 1.02   |               |
| 5     | 13.82     | 10999885 | 606363  | 61.85  |               |
| Total |           | 17786162 | 1075648 | 100.00 |               |

### Trace 4: reaction time 4.0 h

Chromatogram:

mV

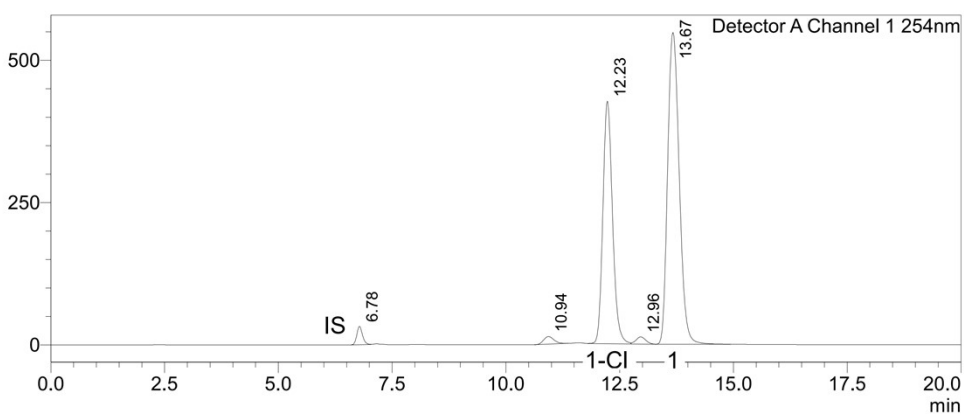

Peak Table:

Detector A Channel 1 254nm

| Peak  | Ret. Time | Area     | Height  | Area%  | Compound Name |
|-------|-----------|----------|---------|--------|---------------|
| 1     | 6.78      | 277378   | 31980   | 1.67   |               |
| 2     | 10.94     | 211048   | 13283   | 1.27   |               |
| 3     | 12.23     | 6268538  | 425966  | 37.68  |               |
| 4     | 12.96     | 183853   | 12592   | 1.11   |               |
| 5     | 13.67     | 9695983  | 547490  | 58.28  |               |
| Total |           | 16636800 | 1031311 | 100.00 |               |

### 10.3 HPLC traces of Table 1, Entry 3

Trace 1: reaction time 1.0 h

Chromatogram:

mV

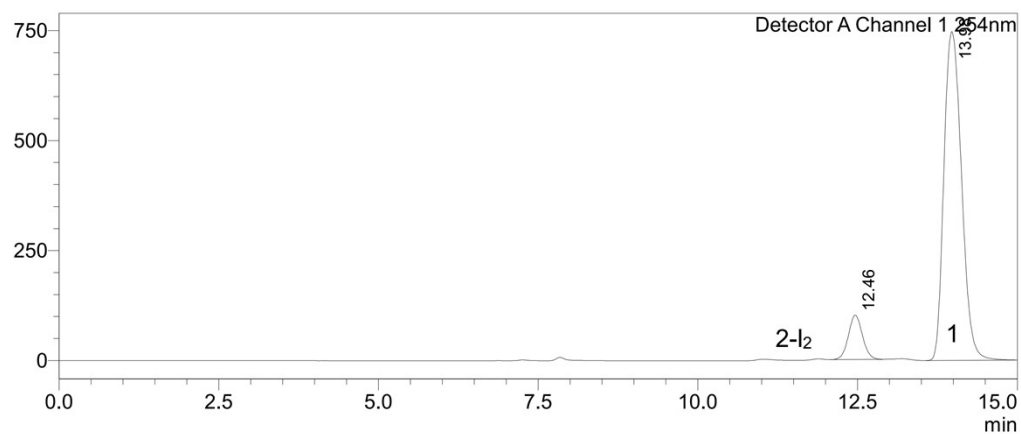

Peak Table:

Detector A Channel 1 254nm

| Peak  | Ret. Time | Area     | Height | Area%  | Compound Name |
|-------|-----------|----------|--------|--------|---------------|
| 1     | 12.46     | 1549614  | 100864 | 9.75   |               |
| 2     | 13.98     | 14343232 | 747150 | 90.25  |               |
| Total |           | 15892845 | 848015 | 100.00 |               |

Trace 2: reaction time 2.0 h

Chromatogram:

mV

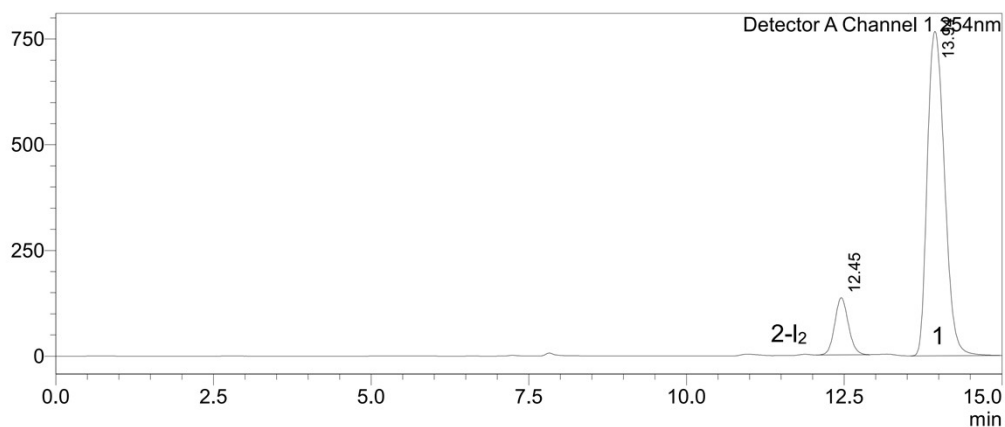

Peak Table:

Detector A Channel 1 254nm

| Peak  | Ret. Time | Area     | Height | Area%  | Compound Name |
|-------|-----------|----------|--------|--------|---------------|
| 1     | 12.45     | 2032657  | 135311 | 12.24  |               |
| 2     | 13.94     | 14575089 | 767208 | 87.76  |               |
| Total |           | 16607746 | 902519 | 100.00 |               |

### Trace 3: reaction time 4.0 h

Chromatogram:

mV

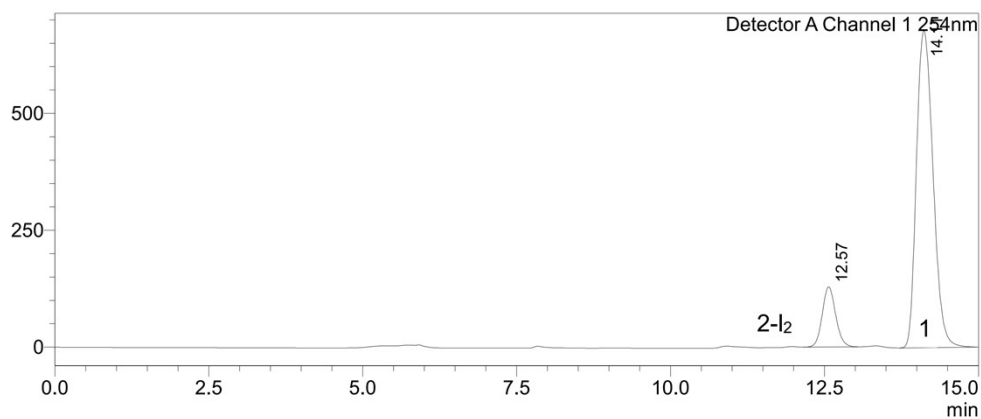

Peak Table:

Detector A Channel 1 254nm

| Peak  | Ret. Time | Area     | Height | Area%  | Compound Name |
|-------|-----------|----------|--------|--------|---------------|
| 1     | 12.57     | 1956354  | 128871 | 13.30  |               |
| 2     | 14.11     | 12748656 | 677364 | 86.70  |               |
| Total |           | 14705010 | 806235 | 100.00 |               |

### 10.4 HPLC traces of Table 1, Entry 4

#### Trace 1: reaction time 4.0 h

Chromatogram:

mV

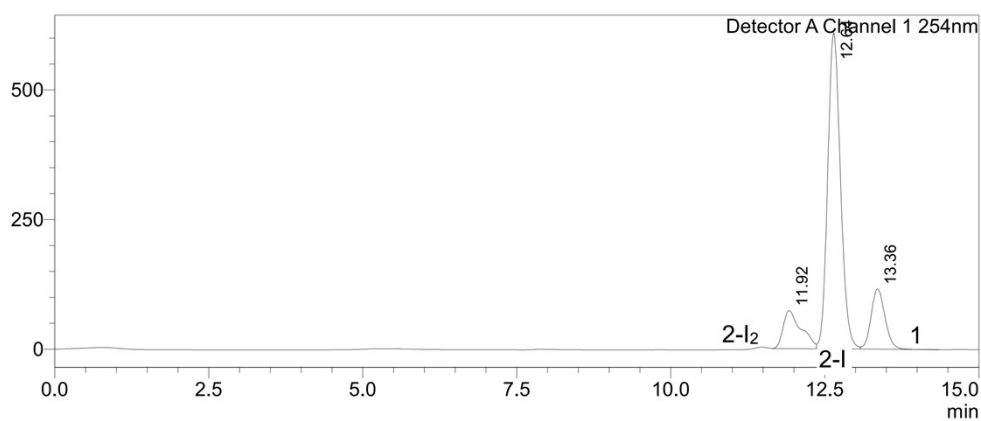

Peak Table:

Detector A Channel 1 254nm

| Peak  | Ret. Time | Area     | Height | Area%  | Compound Name |
|-------|-----------|----------|--------|--------|---------------|
| 1     | 11.92     | 1492229  | 73488  | 12.29  |               |
| 2     | 12.64     | 8820659  | 609469 | 72.64  |               |
| 3     | 13.36     | 1830369  | 116588 | 15.07  |               |
| Total |           | 12143257 | 799546 | 100.00 |               |

## 10.5 HPLC trace of Table 1, Entry 5

Trace 1: reaction time 0 h

Chromatogram:

mV

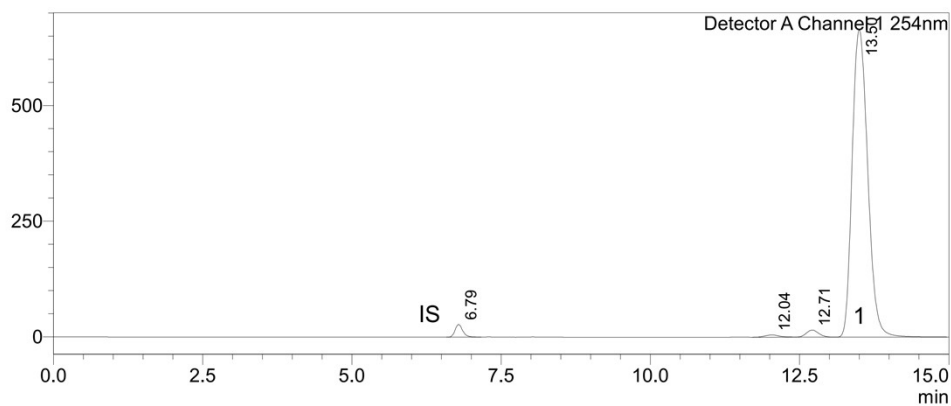

Peak Table:

Detector A Channel 1 254nm

| Peak  | Ret. Time | Area     | Height | Area%  | Compound Name |
|-------|-----------|----------|--------|--------|---------------|
| 1     | 6.79      | 246166   | 27393  | 1.95   |               |
| 2     | 12.04     | 83620    | 4848   | 0.66   |               |
| 3     | 12.71     | 222919   | 15396  | 1.77   |               |
| 4     | 13.50     | 12045786 | 663927 | 95.61  |               |
| Total |           | 12598491 | 711564 | 100.00 |               |

Trace 2: reaction time 4 h

Chromatogram:

mV

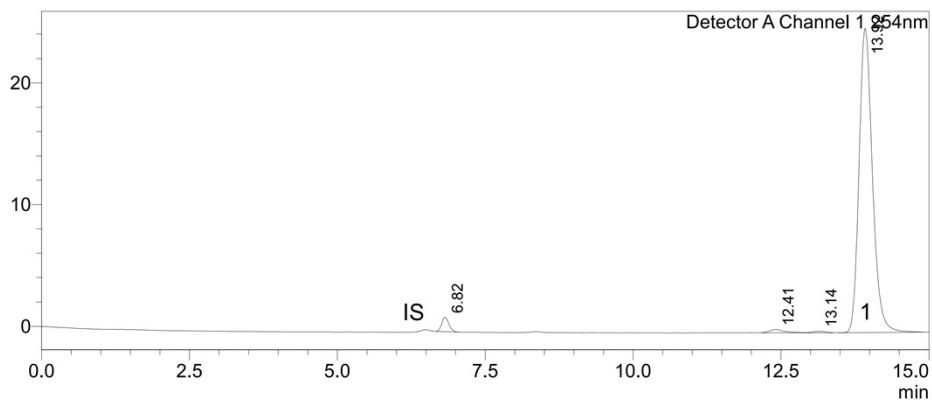

Peak Table:

Detector A Channel 1 254nm

| Peak  | Ret. Time | Area   | Height | Area%  | Compound Name |
|-------|-----------|--------|--------|--------|---------------|
| 1     | 6.82      | 9913   | 1168   | 2.41   |               |
| 2     | 12.41     | 5005   | 273    | 1.22   |               |
| 3     | 13.14     | 2063   | 132    | 0.50   |               |
| 4     | 13.92     | 394071 | 24996  | 95.87  |               |
| Total |           | 411052 | 26569  | 100.00 |               |

## 11. HPLC traces of condition selection tests

### Trace 1: I-1

Chromatogram:

mV

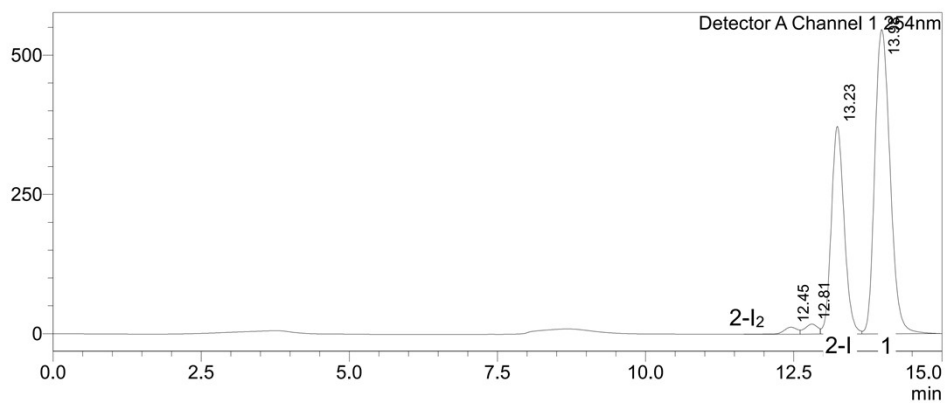

Peak Table:

Detector A Channel 1 254nm

| Peak  | Ret. Time | Area     | Height | Area%  | Compound Name |
|-------|-----------|----------|--------|--------|---------------|
| 1     | 12.45     | 195036   | 12470  | 1.23   |               |
| 2     | 12.81     | 266247   | 17904  | 1.67   |               |
| 3     | 13.23     | 5637385  | 372883 | 35.42  |               |
| 4     | 13.98     | 9817217  | 546284 | 61.68  |               |
| Total |           | 15915885 | 949540 | 100.00 |               |

### Trace 2: I-2

Chromatogram:

mV

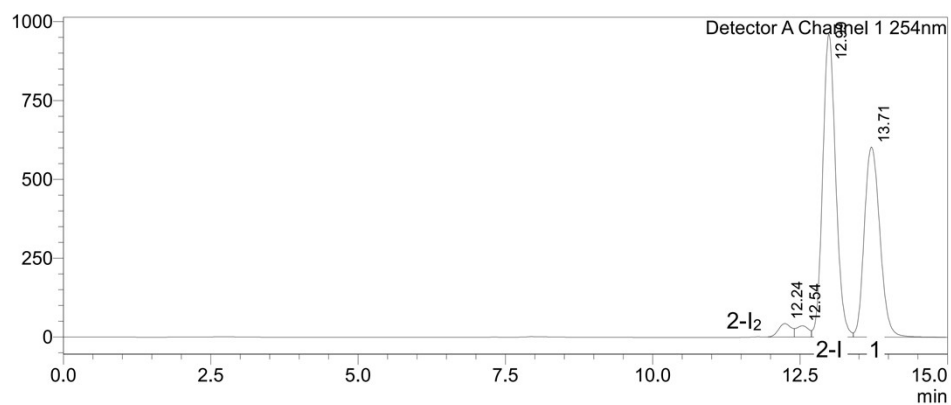

Peak Table:

Detector A Channel 1 254nm

| Peak  | Ret. Time | Area     | Height  | Area%  | Compound Name |
|-------|-----------|----------|---------|--------|---------------|
| 1     | 12.24     | 649241   | 42588   | 2.40   |               |
| 2     | 12.54     | 519841   | 35546   | 1.92   |               |
| 3     | 12.99     | 14752861 | 960372  | 54.58  |               |
| 4     | 13.71     | 11107655 | 602993  | 41.09  |               |
| Total |           | 27029598 | 1641499 | 100.00 |               |

### Trace 3: I-3

Chromatogram:

mV

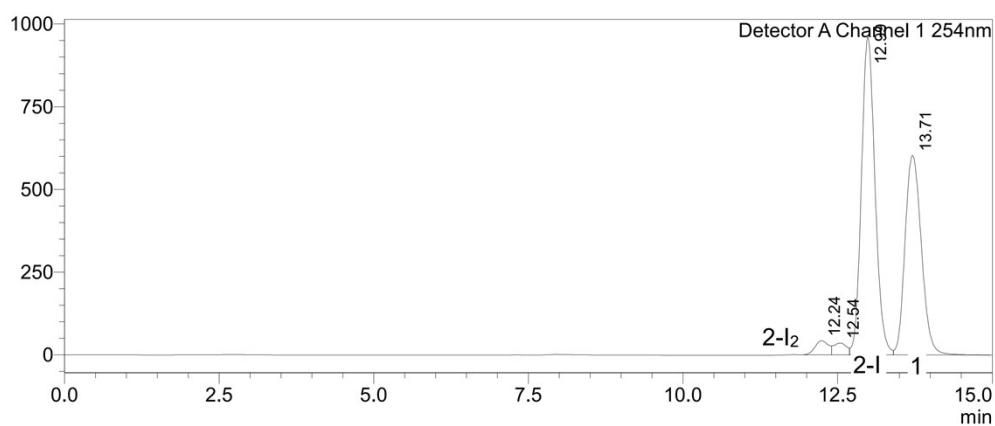

Peak Table:

Detector A Channel 1 254nm

| Peak  | Ret. Time | Area     | Height  | Area%  | Compound Name |
|-------|-----------|----------|---------|--------|---------------|
| 1     | 12.24     | 649241   | 42588   | 2.40   |               |
| 2     | 12.54     | 519841   | 35546   | 1.92   |               |
| 3     | 12.99     | 14752861 | 960372  | 54.58  |               |
| 4     | 13.71     | 11107655 | 602993  | 41.09  |               |
| Total |           | 27029598 | 1641499 | 100.00 |               |

### Trace 4: I-4

Chromatogram:

mV

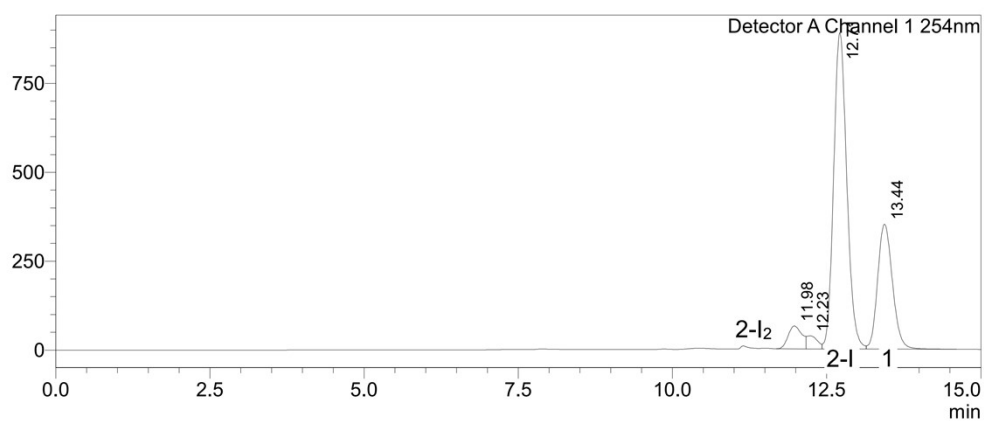

Peak Table:

Detector A Channel 1 254nm

| Peak  | Ret. Time | Area     | Height  | Area%  | Compound Name |
|-------|-----------|----------|---------|--------|---------------|
| 1     | 11.98     | 1008300  | 64528   | 4.91   |               |
| 2     | 12.23     | 439113   | 36731   | 2.14   |               |
| 3     | 12.71     | 13214599 | 889291  | 64.30  |               |
| 4     | 13.44     | 5889896  | 351373  | 28.66  |               |
| Total |           | 20551907 | 1341923 | 100.00 |               |



## Trace 5: I-5

Chromatogram:

mV

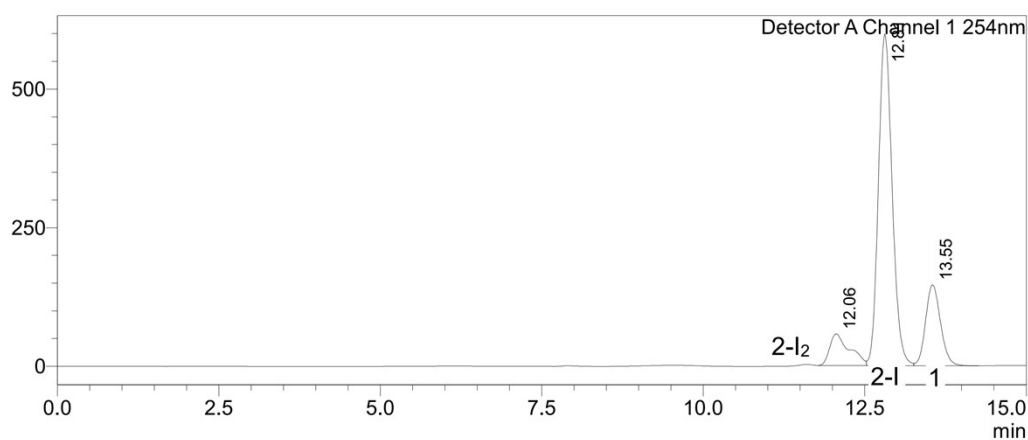

Peak Table:

Detector A Channel 1 254nm

| Peak  | Ret. Time | Area     | Height | Area%  | Compound Name |
|-------|-----------|----------|--------|--------|---------------|
| 1     | 12.06     | 1219158  | 57181  | 9.82   |               |
| 2     | 12.81     | 8856022  | 597846 | 71.30  |               |
| 3     | 13.55     | 2345594  | 145910 | 18.88  |               |
| Total |           | 12420775 | 800938 | 100.00 |               |

## Trace 6: I-6

Chromatogram:

mV

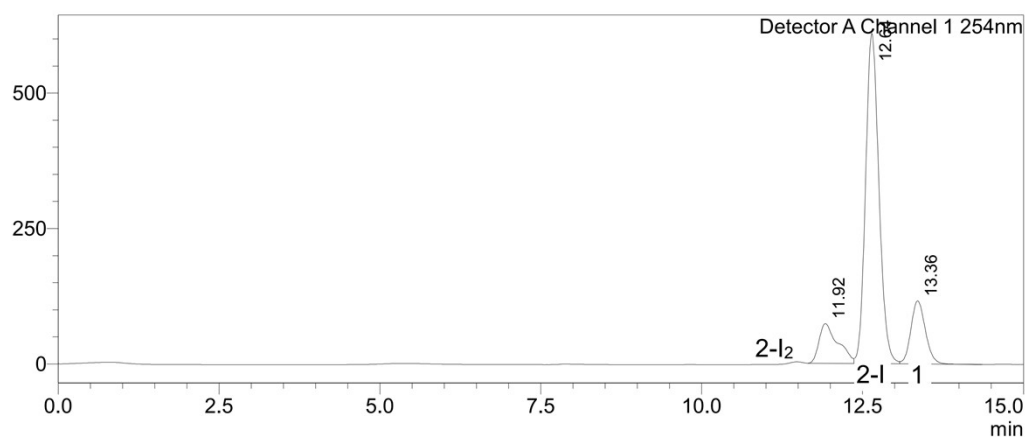

Peak Table:

Detector A Channel 1 254nm

| Peak  | Ret. Time | Area     | Height | Area%  | Compound Name |
|-------|-----------|----------|--------|--------|---------------|
| 1     | 11.92     | 1492229  | 73488  | 12.29  |               |
| 2     | 12.64     | 8820659  | 609469 | 72.64  |               |
| 3     | 13.36     | 1830369  | 116588 | 15.07  |               |
| Total |           | 12143257 | 799546 | 100.00 |               |

## Trace 7: I-7

Chromatogram:

mV

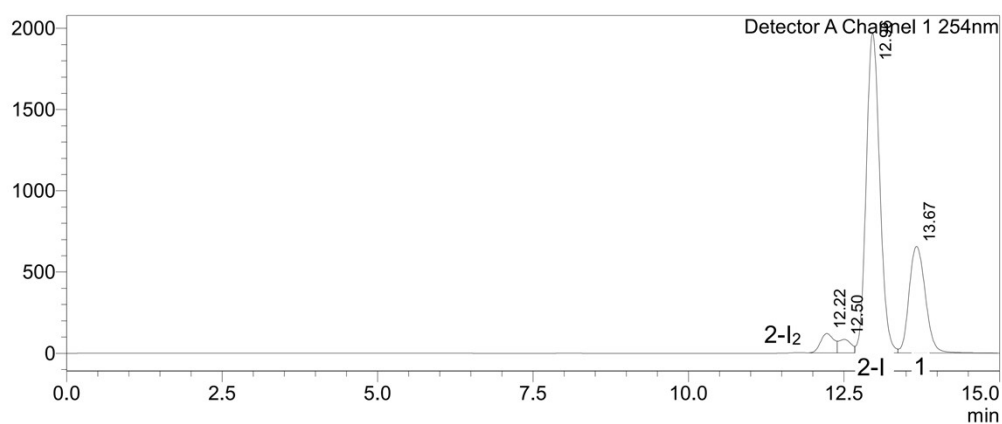

Peak Table:

Detector A Channel 1 254nm

| Peak  | Ret. Time | Area     | Height  | Area%  | Compound Name |
|-------|-----------|----------|---------|--------|---------------|
| 1     | 12.22     | 1798388  | 119195  | 4.02   |               |
| 2     | 12.50     | 1160618  | 82683   | 2.59   |               |
| 3     | 12.96     | 29863779 | 1966637 | 66.72  |               |
| 4     | 13.67     | 11939328 | 655860  | 26.67  |               |
| Total |           | 44762113 | 2824375 | 100.00 |               |

## Trace 8: I-8

Chromatogram:

mV

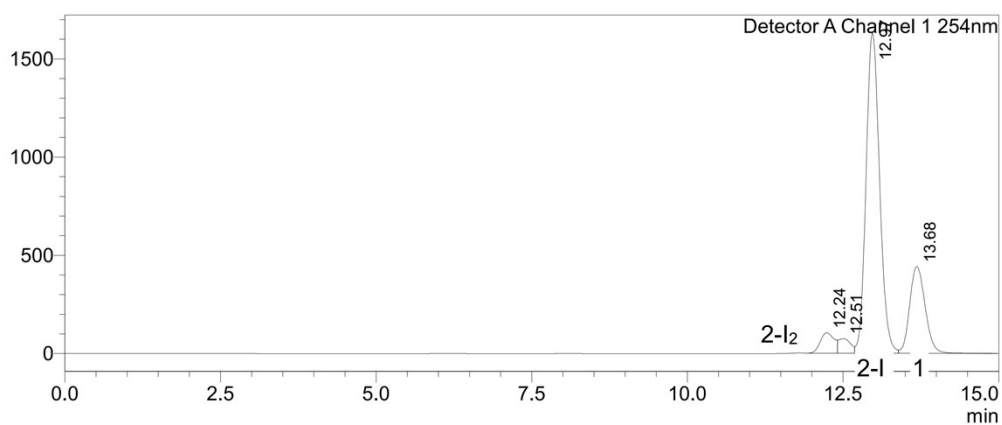

Peak Table:

Detector A Channel 1 254nm

| Peak  | Ret. Time | Area     | Height  | Area%  | Compound Name |
|-------|-----------|----------|---------|--------|---------------|
| 1     | 12.24     | 1621500  | 104151  | 4.64   |               |
| 2     | 12.51     | 998691   | 73930   | 2.86   |               |
| 3     | 12.97     | 24675931 | 1630637 | 70.61  |               |
| 4     | 13.68     | 7650221  | 442074  | 21.89  |               |
| Total |           | 34946343 | 2250792 | 100.00 |               |

## Trace 9: I-9

Chromatogram:

mV

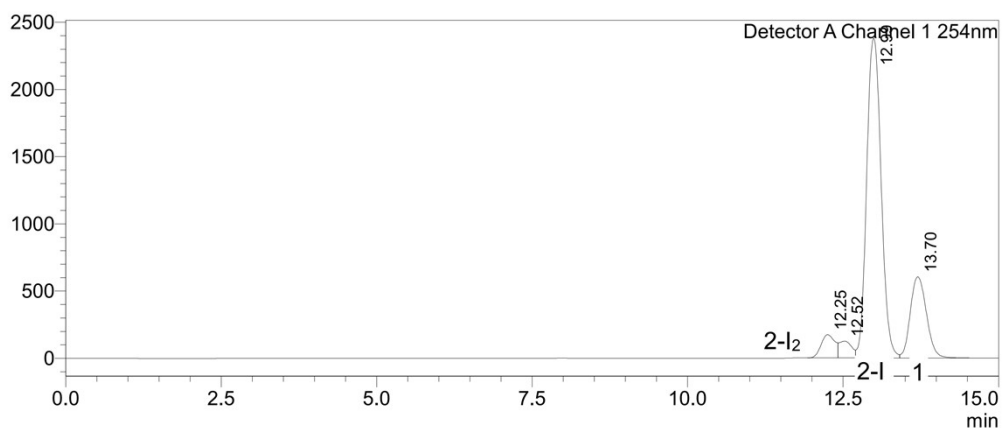

Peak Table:

Detector A Channel 1 254nm

| Peak  | Ret. Time | Area     | Height  | Area%  | Compound Name |
|-------|-----------|----------|---------|--------|---------------|
| 1     | 12.25     | 2678746  | 172917  | 4.98   |               |
| 2     | 12.52     | 1749667  | 124820  | 3.25   |               |
| 3     | 12.99     | 38435082 | 2378891 | 71.45  |               |
| 4     | 13.70     | 10927092 | 604781  | 20.31  |               |
| Total |           | 53790587 | 3281408 | 100.00 |               |

## Trace 10: I-10

Chromatogram:

mV

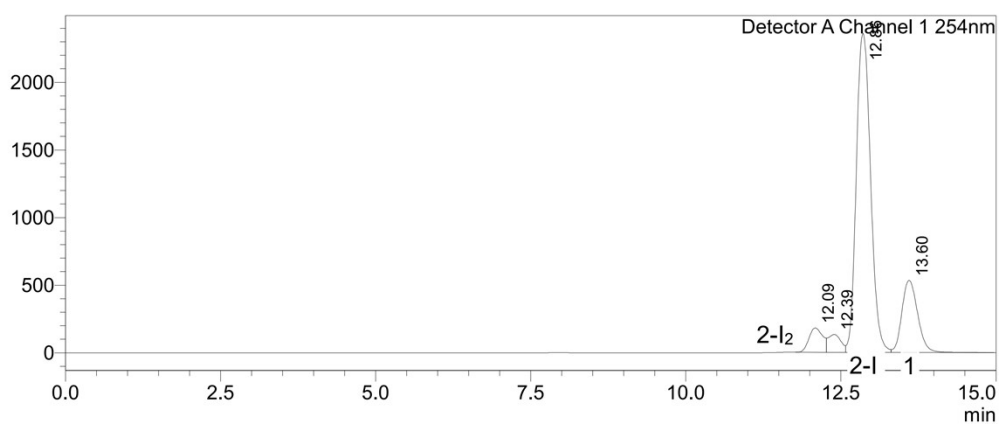

Peak Table:

Detector A Channel 1 254nm

| Peak  | Ret. Time | Area     | Height  | Area%  | Compound Name |
|-------|-----------|----------|---------|--------|---------------|
| 1     | 12.09     | 2813625  | 180626  | 5.41   |               |
| 2     | 12.39     | 1889635  | 132037  | 3.63   |               |
| 3     | 12.86     | 37861104 | 2358708 | 72.81  |               |
| 4     | 13.60     | 9432239  | 533143  | 18.14  |               |
| Total |           | 51996603 | 3204515 | 100.00 |               |

## Trace 11: I-11

Chromatogram:

mV

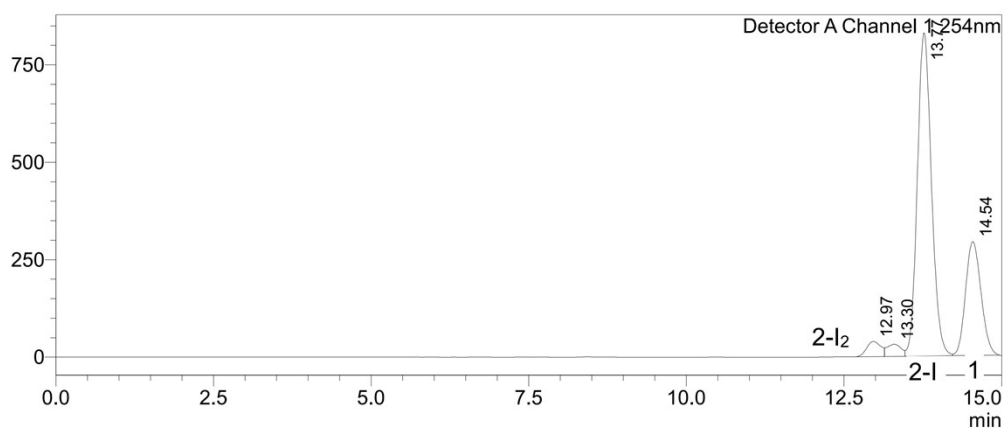

Peak Table:

Detector A Channel 1 254nm

| Peak  | Ret. Time | Area     | Height  | Area%  | Compound Name |
|-------|-----------|----------|---------|--------|---------------|
| 1     | 12.97     | 614039   | 39076   | 3.23   |               |
| 2     | 13.30     | 487420   | 31200   | 2.56   |               |
| 3     | 13.77     | 12939976 | 829149  | 67.99  |               |
| 4     | 14.54     | 4991576  | 292181  | 26.23  |               |
| Total |           | 19033010 | 1191607 | 100.00 |               |

## Trace 12: I-12

Chromatogram:

mV

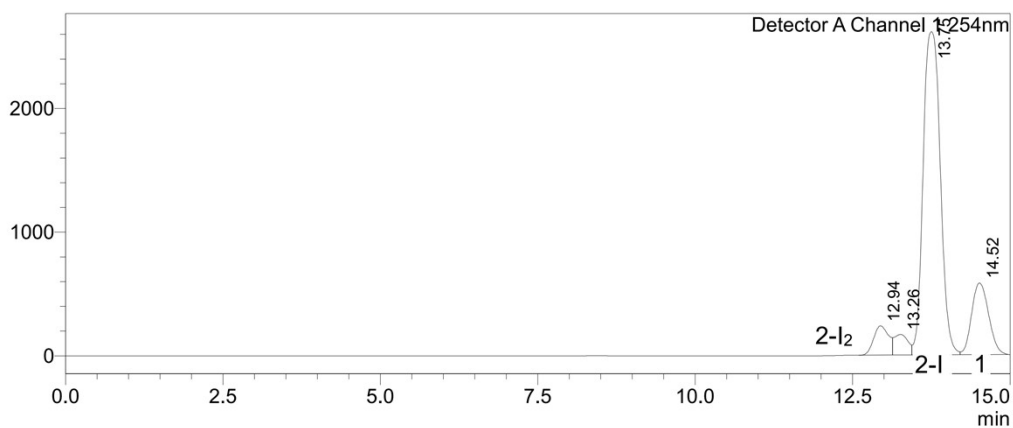

Peak Table:

Detector A Channel 1 254nm

| Peak  | Ret. Time | Area     | Height  | Area%  | Compound Name |
|-------|-----------|----------|---------|--------|---------------|
| 1     | 12.94     | 3932611  | 236805  | 5.88   |               |
| 2     | 13.26     | 2543565  | 166223  | 3.81   |               |
| 3     | 13.75     | 49515737 | 2613407 | 74.09  |               |
| 4     | 14.52     | 10842132 | 578576  | 16.22  |               |
| Total |           | 66834045 | 3595012 | 100.00 |               |

### Trace 13: I-13

Chromatogram:

mV

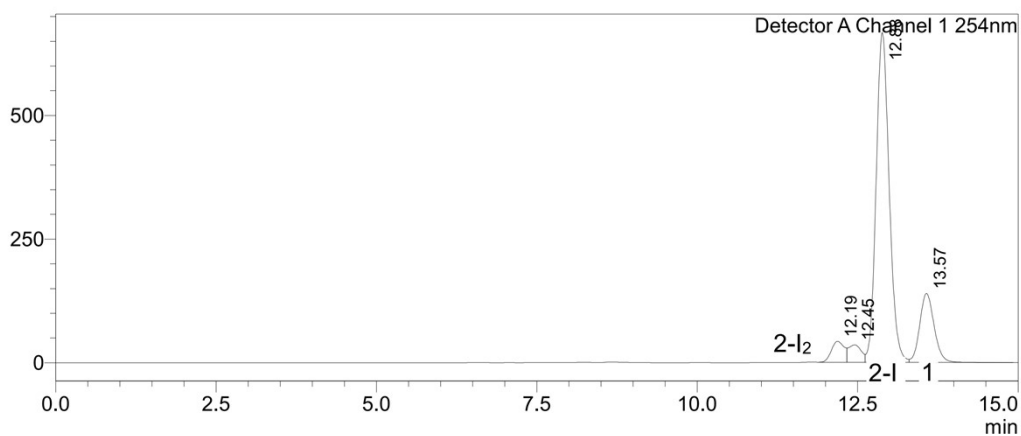

Peak Table:

Detector A Channel 1 254nm

| Peak  | Ret. Time | Area     | Height | Area%  | Compound Name |
|-------|-----------|----------|--------|--------|---------------|
| 1     | 12.19     | 598241   | 42297  | 4.70   |               |
| 2     | 12.45     | 485247   | 35219  | 3.82   |               |
| 3     | 12.88     | 9452622  | 666984 | 74.33  |               |
| 4     | 13.57     | 2180848  | 139462 | 17.15  |               |
| Total |           | 12716958 | 883963 | 100.00 |               |

### Trace 14: Br-1

Chromatogram:

mV

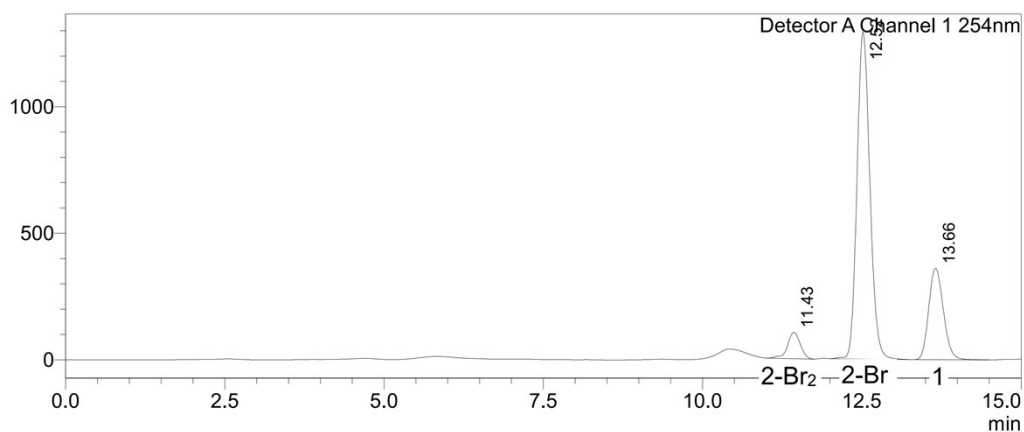

Peak Table:

Detector A Channel 1 254nm

| Peak  | Ret. Time | Area     | Height  | Area%  | Compound Name |
|-------|-----------|----------|---------|--------|---------------|
| 1     | 11.43     | 1449005  | 104510  | 5.70   |               |
| 2     | 12.52     | 18221566 | 1291616 | 71.62  |               |
| 3     | 13.66     | 5772793  | 361528  | 22.69  |               |
| Total |           | 25443364 | 1757654 | 100.00 |               |

## 12. HPLC traces of purified 2-I, 2-Br & 2-Br<sub>2</sub>

Trace 1: 2-I (96.8 % purity)

Chromatogram:

mV

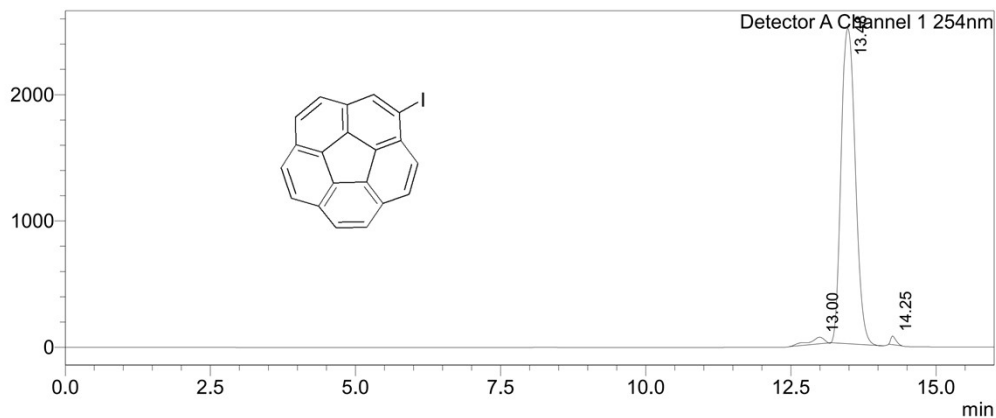

Peak Table:

Detector A Channel 1 254nm

| Peak  | Ret. Time | Area     | Height  | Area%  | Compound Name |
|-------|-----------|----------|---------|--------|---------------|
| 1     | 13.00     | 963828   | 52164   | 2.20   |               |
| 2     | 13.48     | 42390834 | 2494868 | 96.80  |               |
| 3     | 14.25     | 439051   | 68852   | 1.00   |               |
| Total |           | 43793712 | 2615884 | 100.00 |               |

Trace 2: 2-Br (98.1 % purity)

Chromatogram:

mV

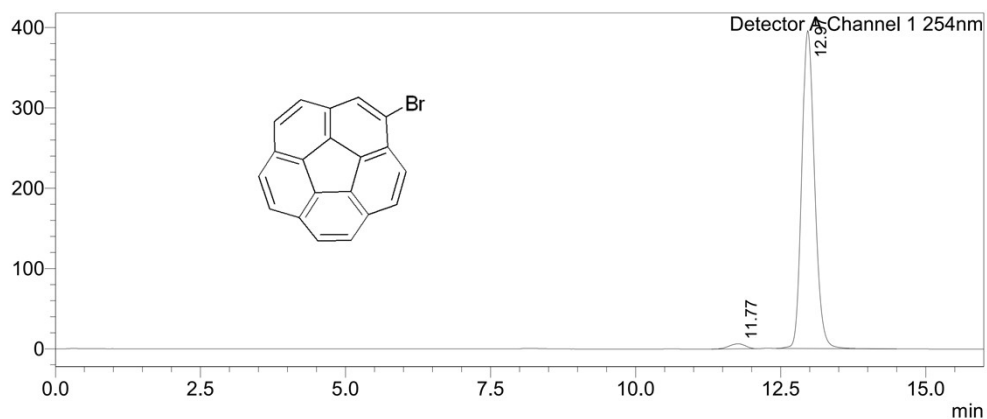

Peak Table:

Detector A Channel 1 254nm

| Peak  | Ret. Time | Area    | Height | Area%  | Compound Name |
|-------|-----------|---------|--------|--------|---------------|
| 1     | 11.77     | 121654  | 6265   | 1.95   |               |
| 2     | 12.97     | 6116968 | 395922 | 98.05  |               |
| Total |           | 6238622 | 402188 | 100.00 |               |

### Trace 3: 2-Br<sub>2</sub>

Chromatogram:

mV

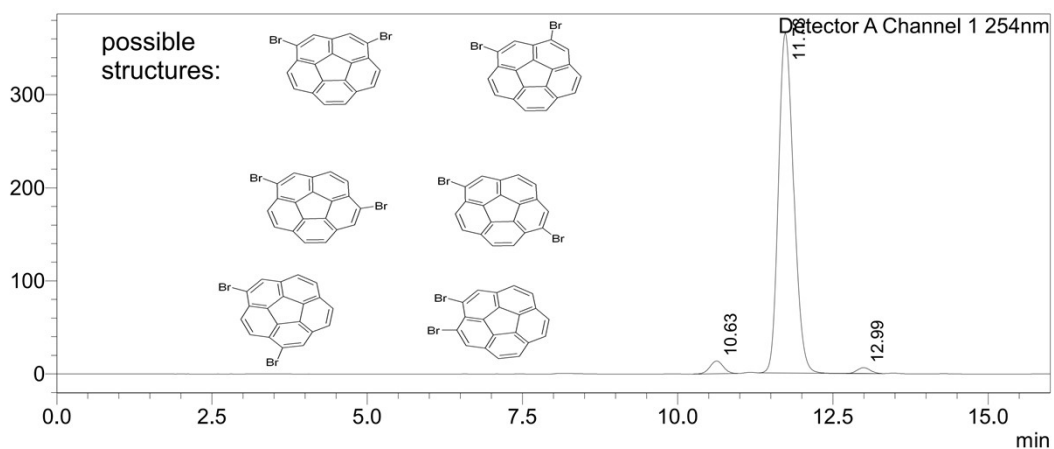

Peak Table:

Detector A Channel 1 254nm

| Peak  | Ret. Time | Area    | Height | Area%  | Compound Name |
|-------|-----------|---------|--------|--------|---------------|
| 1     | 10.63     | 205810  | 13626  | 3.14   |               |
| 2     | 11.73     | 6248470 | 365290 | 95.47  |               |
| 3     | 12.99     | 90743   | 6264   | 1.39   |               |
| Total |           | 6545023 | 385180 | 100.00 |               |

## 12. Copies of NMR spectra for crude and purified 2-I

Crude 2-I:

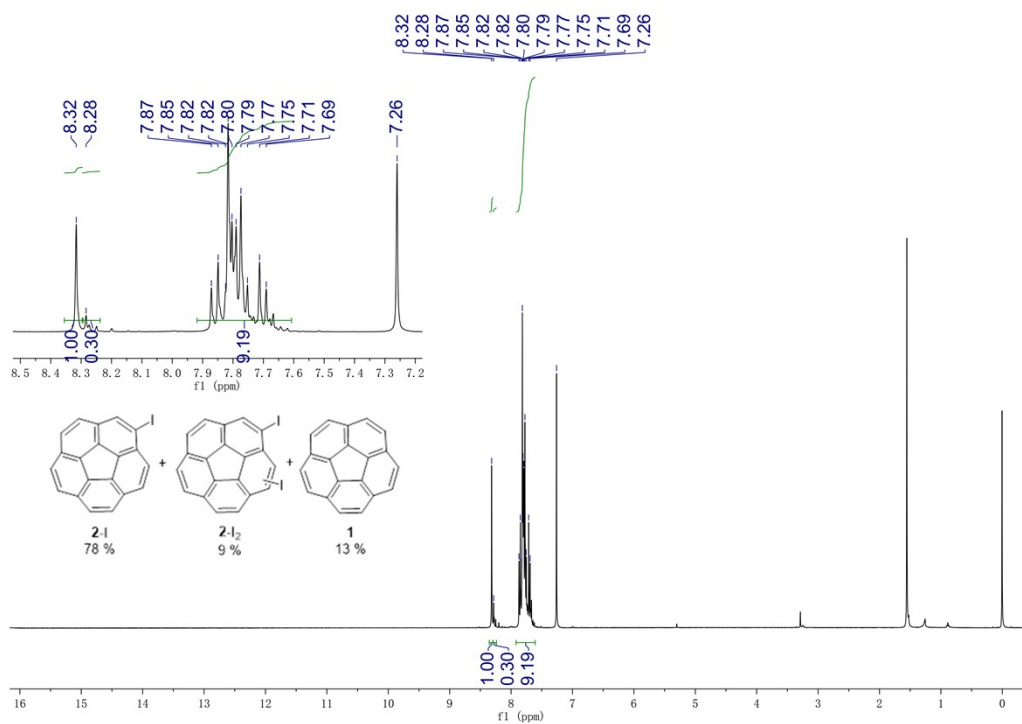

## Purified 2-I:

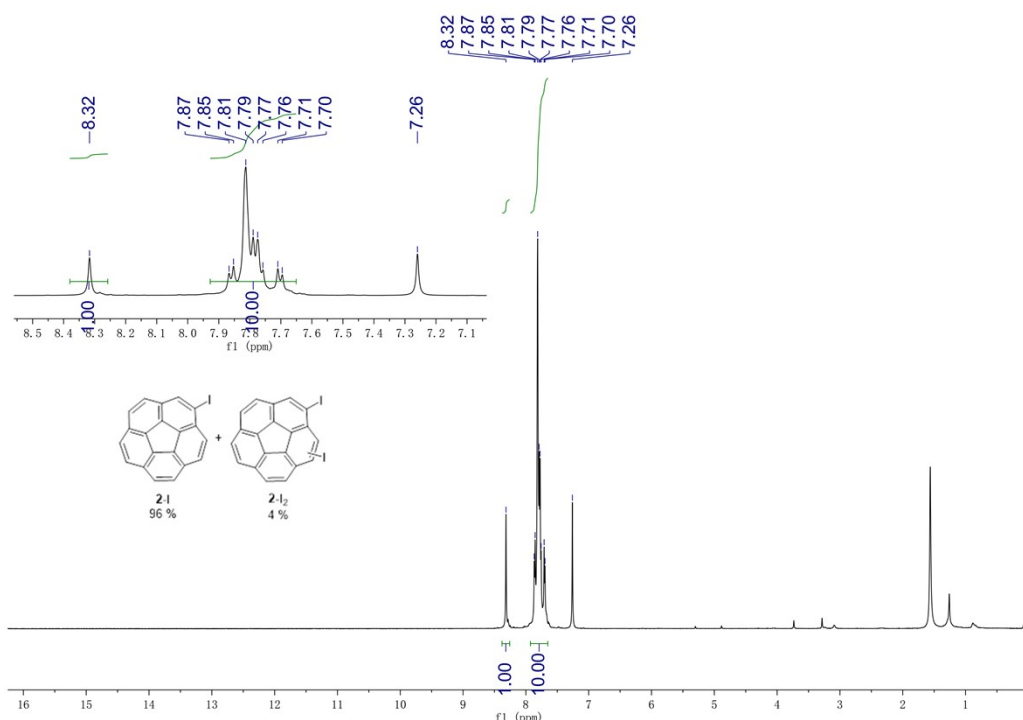

## 13. Characterization of compounds 6-7

### Compound 6

Spectroscopic data:  $^1\text{H}$ -NMR (400 MHz,  $\text{CDCl}_3$ ):  $\delta$ /ppm 7.96 (2H, s), 7.71 (2H, s), 5.89 (2H, s).  $^{13}\text{C}$ -NMR (101 MHz,  $\text{CDCl}_3$ ):  $\delta$ /ppm 58.39, 126.76, 127.09, 127.39, 128.14, 130.00, 131.41, 132.57, 133.40, 134.11, 134.40. MALDI-TOF-MS ( $\text{C}_{20}\text{H}_6\text{Cl}_6$ ): Calculated 455.860, found 455.832.

### Compound 7

Spectroscopic data:  $^1\text{H}$ -NMR (400 MHz,  $\text{CDCl}_3$ ):  $\delta$ /ppm 7.84 (2H, s), 7.81 (2H, s), 7.60 (2H, s), 7.29 (4H, d,  $J = 8\text{Hz}$ ), 7.24 (4H, d,  $J = 8\text{Hz}$ ), 7.10 (8H, t,  $J = 8\text{Hz}$ ).  $^{13}\text{C}$ -NMR (101 MHz,  $\text{CDCl}_3$ ):  $\delta$ /ppm 21.30, 29.85, 126.90, 127.04, 128.37, 128.89, 129.22, 130.29, 130.30, 131.16, 131.28, 131.74, 131.98, 132.04, 132.13, 135.49, 136.32, 136.52, 137.28, 137.39, 137.47. MALDI-TOF-MS ( $\text{C}_{48}\text{H}_{34}\text{S}_4$ ): Calculated 738.154, found 738.075.

## 14. Copies of NMR spectra for 6-7



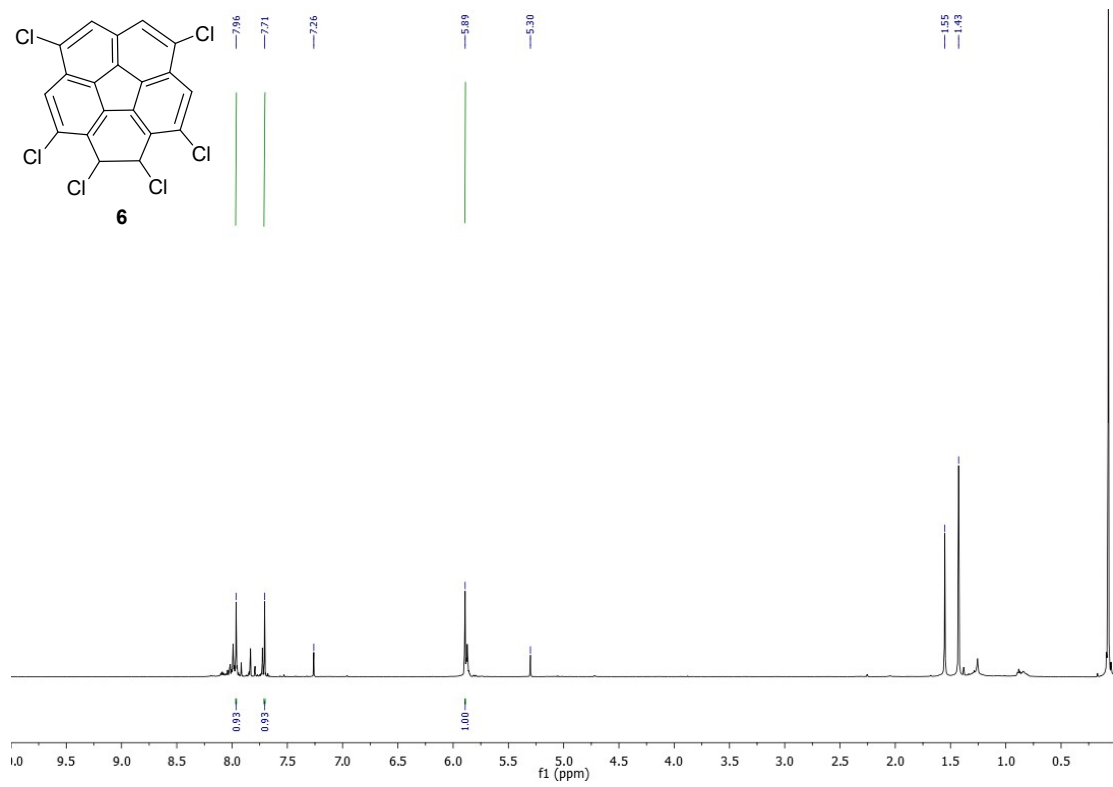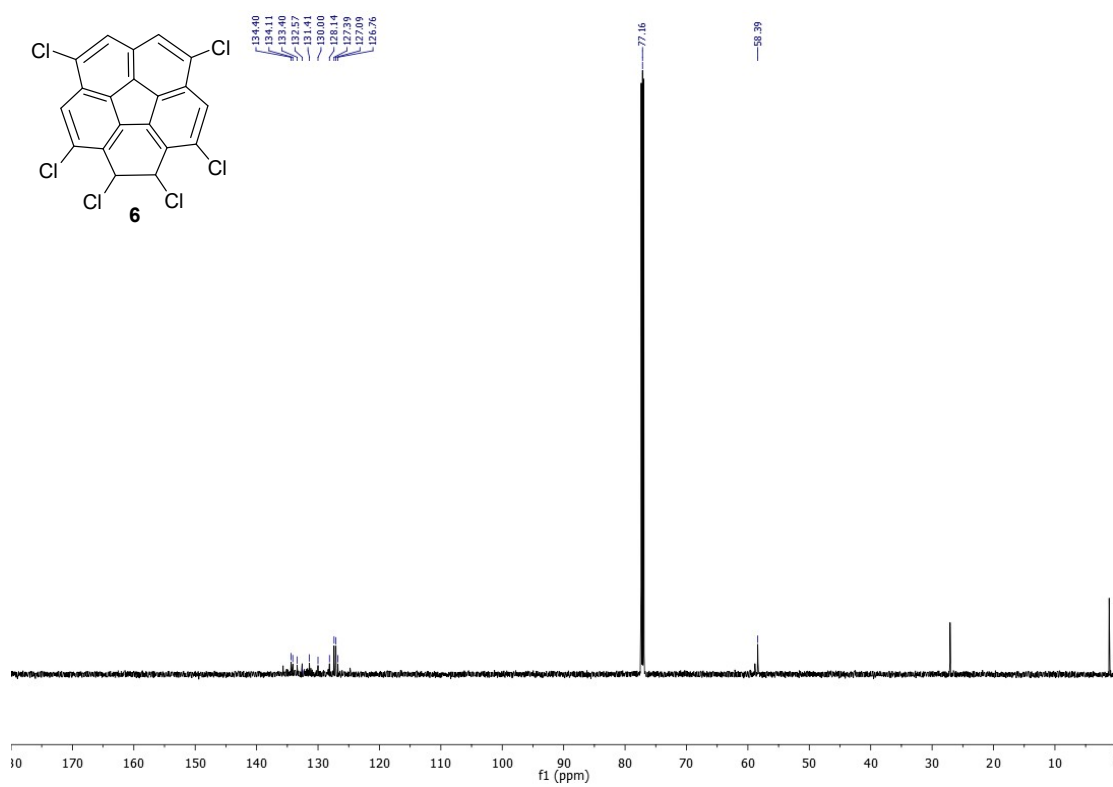

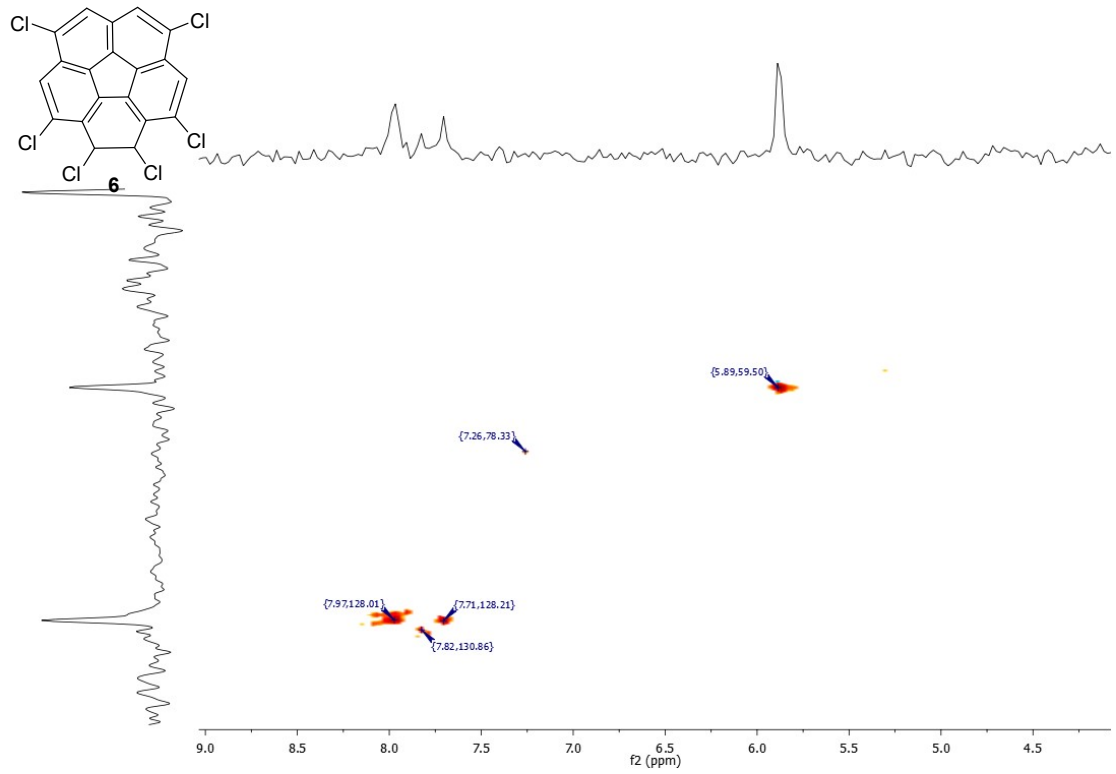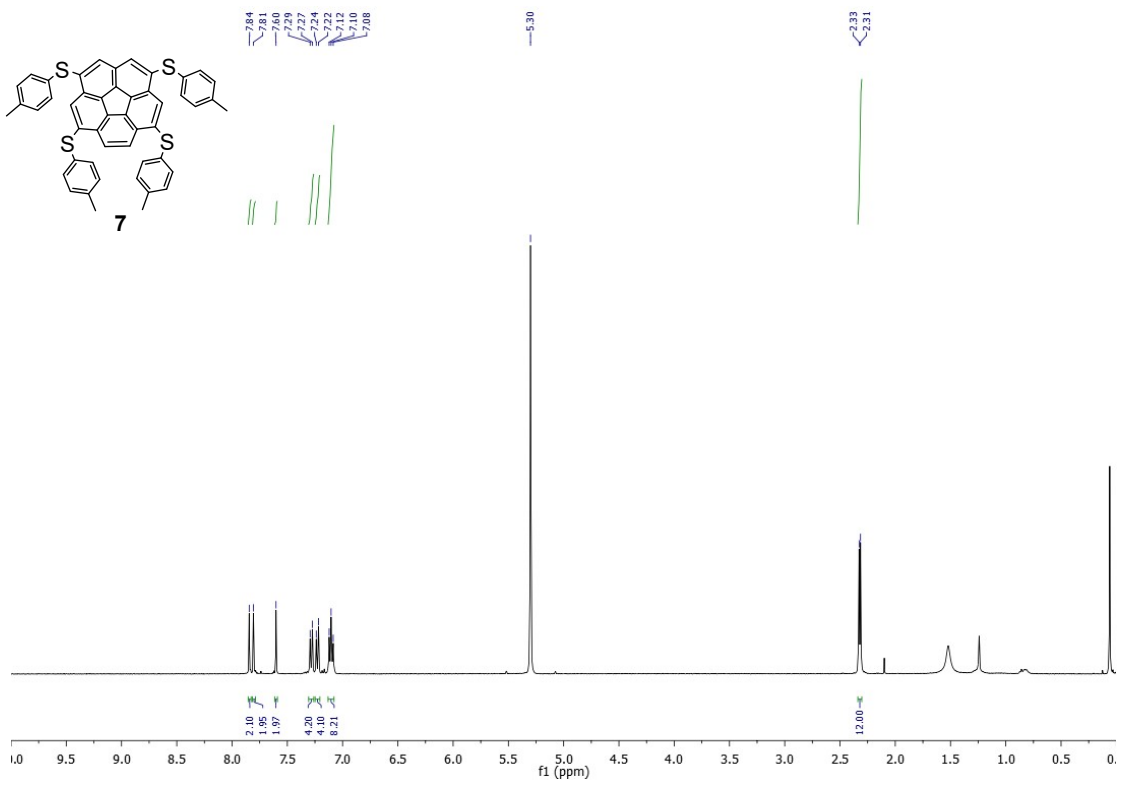

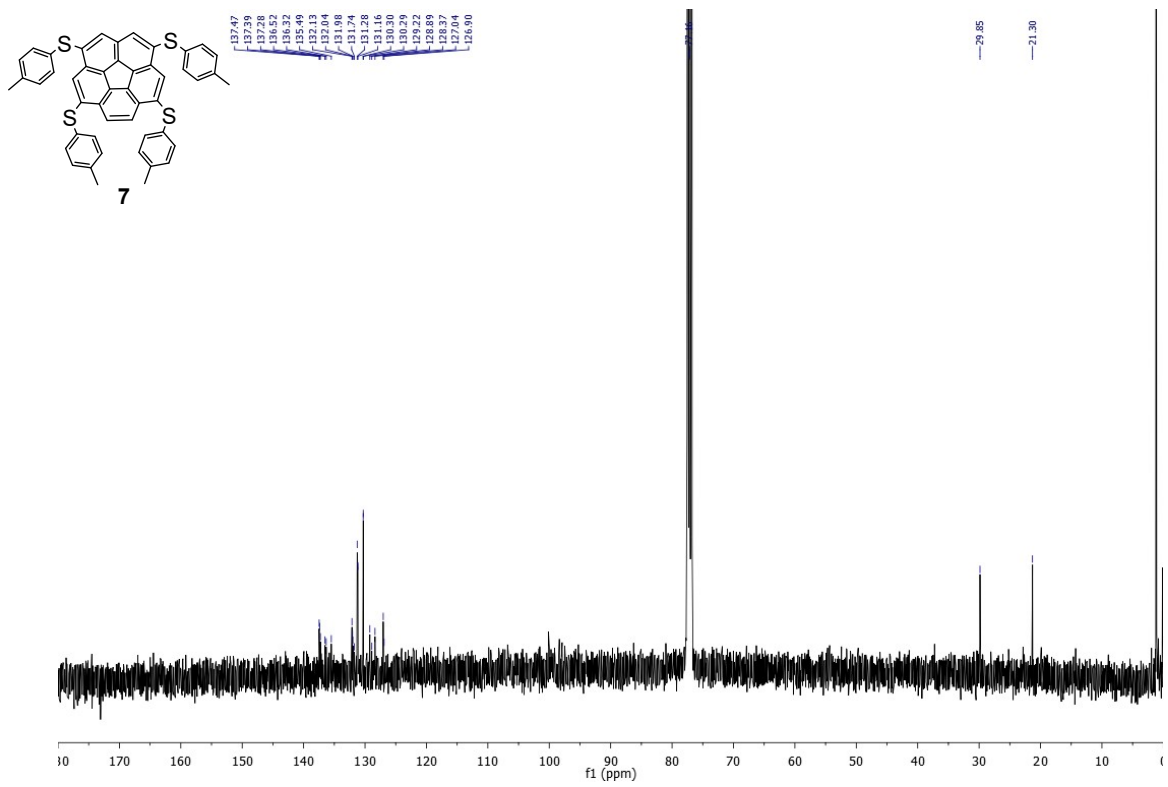

Supplement: d2re00010e1.pdf [file d2re00010e1.pdf]
